# Supplementary material for: MAD2L2 promotes replication fork protection and recovery in a shieldin-independent and REV3L-dependent manner
Source: PubMed Central journal article supplement (PMC9458726; doi:10.1038/s41467-022-32861-5), 2022-09-08
Supplement: 41467_2022_32861_MOESM1_ESM.pdf [file 41467_2022_32861_MOESM1_ESM.pdf]

## **Supplementary Information**

### **MAD2L2 promotes replication fork protection and recovery in a shieldin-independent and REV3L-dependent manner**

Inés Paniagua<sup>1</sup>, Zainab Tayeh<sup>1</sup>, Mattia Falcone<sup>1</sup>, Santiago Hernández Pérez<sup>1</sup>, Aurora Cerutti<sup>1</sup>,  
Jacqueline J. L. Jacobs<sup>1,\*</sup>

This file contains:

- Supplementary Fig. 1
- Supplementary Fig. 2
- Supplementary Fig. 3
- Supplementary Fig. 4
- Supplementary Fig. 5
- Supplementary Fig. 6
- Supplementary Fig. 7
- Supplementary References
- Extended Data 1

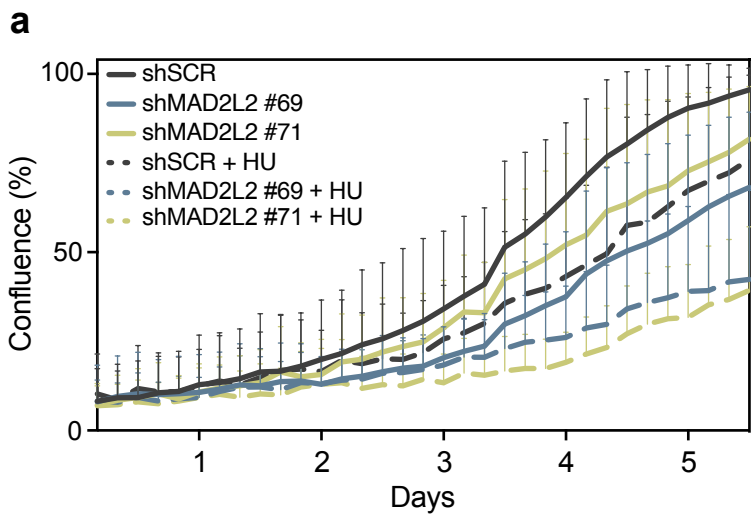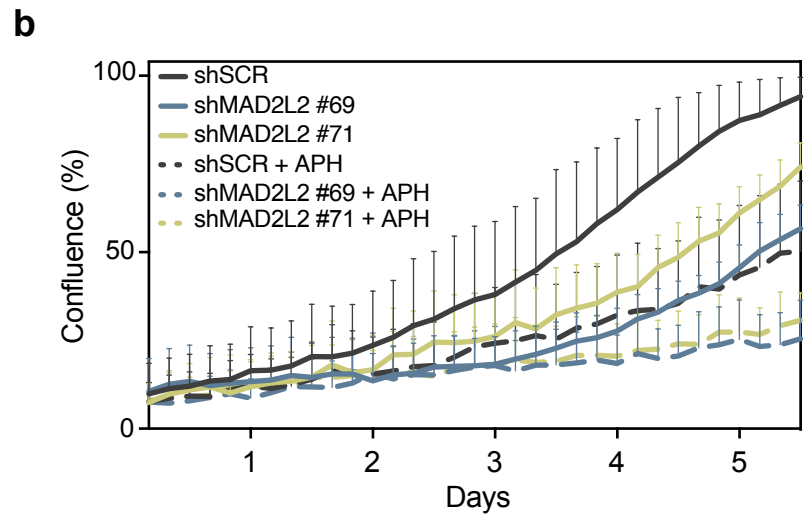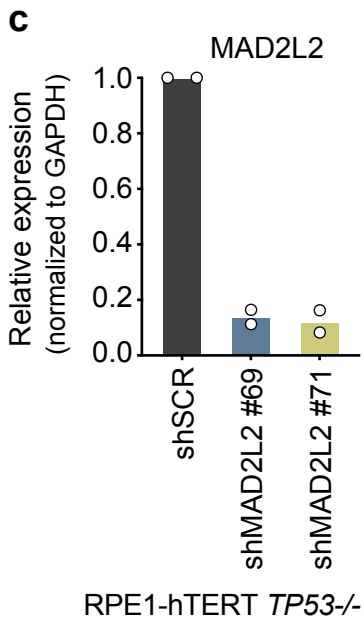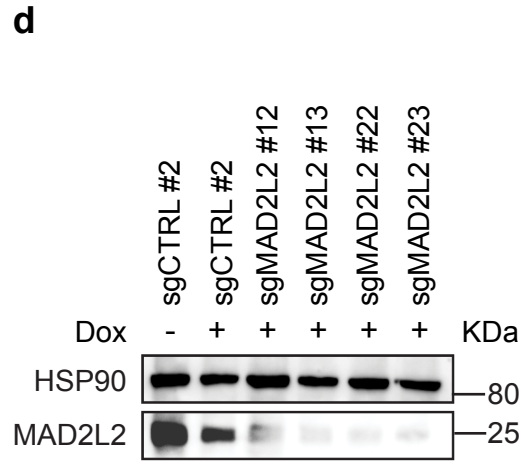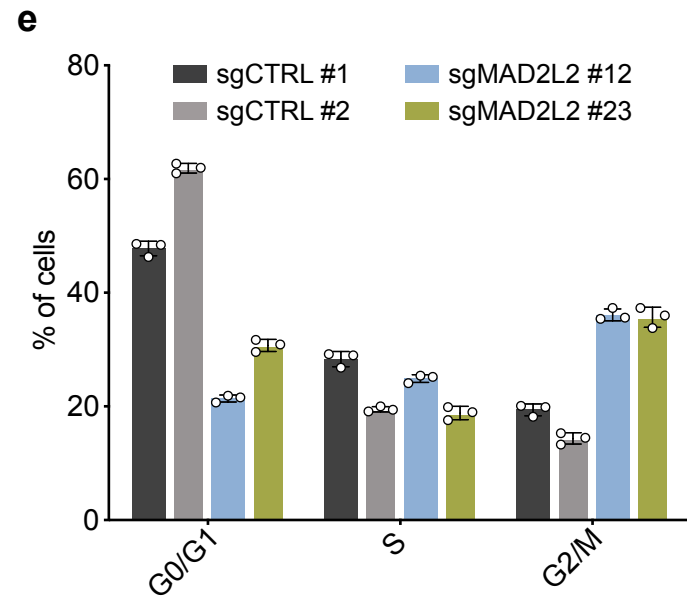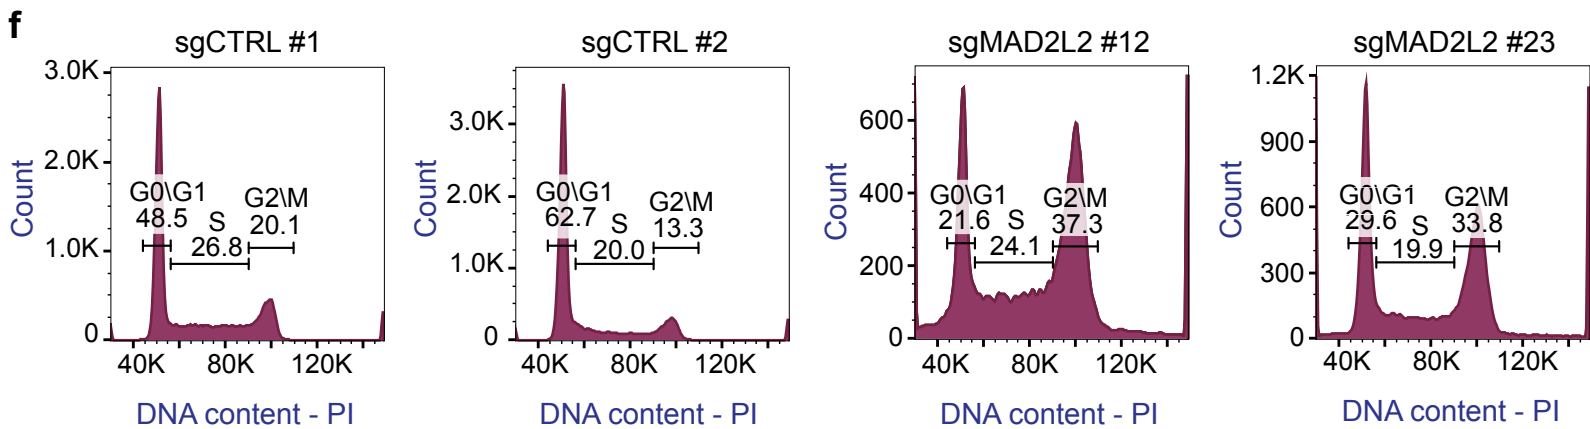

**Supplementary Figure 1 - related to Fig. 1. Impaired DNA replication in MAD2L2-depleted cells is not associated with impaired S-phase progression**

**a, b**, Proliferation of control (shSCR) and MAD2L2-depleted RPE1-hTERT *TP53*<sup>-/-</sup> cells, untreated (continuous line) or treated (dashed line) with 150  $\mu$ M HU (**a**) or 0.2  $\mu$ M aphidicolin (APH) (**b**). Confluency was measured using the Incucyte. Mean  $\pm$  SD of three independent experiments is shown for (**a**), mean  $\pm$  SEM from two independent experiments is shown for (**b**).

**c**, qPCR analysis of *MAD2L2* expression in RPE1-hTERT *TP53*<sup>-/-</sup> cells. Data were normalized to *GAPDH* expression. Bars represent the mean. Each dot represents one of two independent experiments.

**d**, Immunoblot analysis of MAD2L2 in HeLa cells stably expressing doxycycline-inducible sgRNAs, after 6 days of doxycycline treatment. HSP90 serves as loading control. A representative blot of three independent experiments is shown.

**e**, Percentage of G1-, S- and G2-phase cells in control (sgCTRL) and MAD2L2-depleted HeLa cells, determined by propidium iodide (PI) staining and FACS analysis, after 6 days of doxycycline treatment. Of note, MAD2L2-depletion caused an increase in G2/M-phase cells, in line with a previously reported mitotic role for MAD2L2<sup>1</sup>. Bars represent the mean  $\pm$  SD. Each dot represents one of three independent experiments.

**f**, Example of the gating strategy for cell cycle analysis of the cells from Fig. S1e.

**a**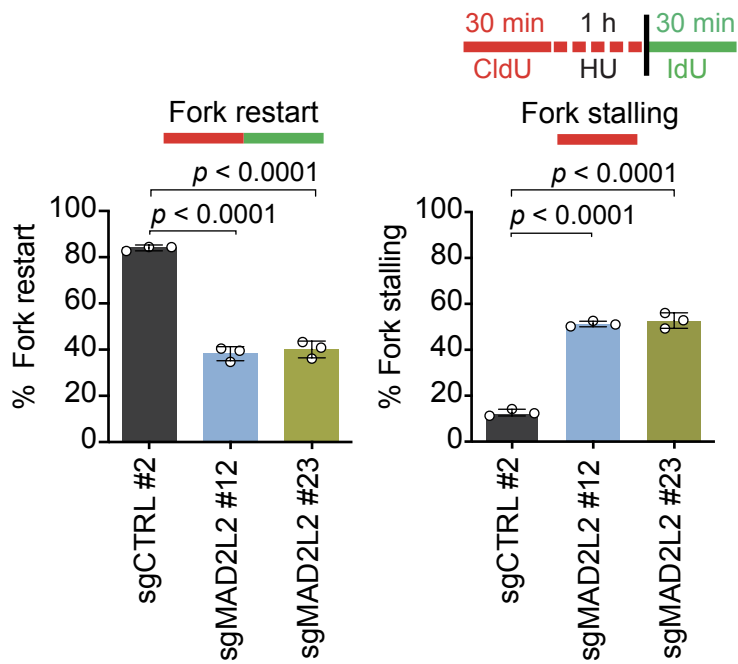**b**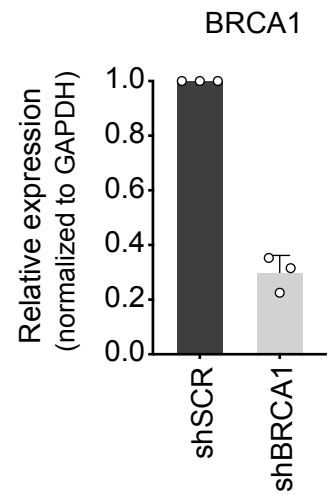**c**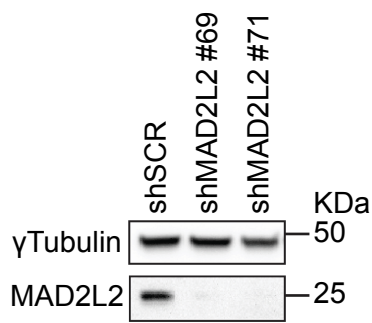**d**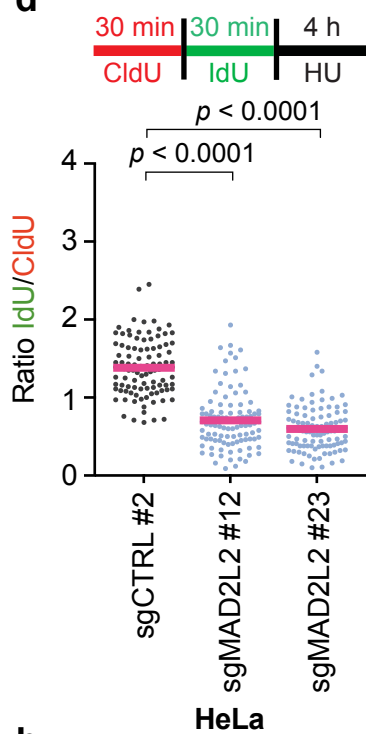**e**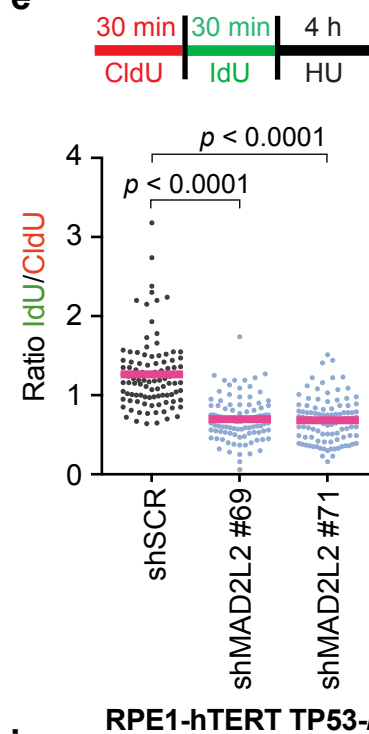**f**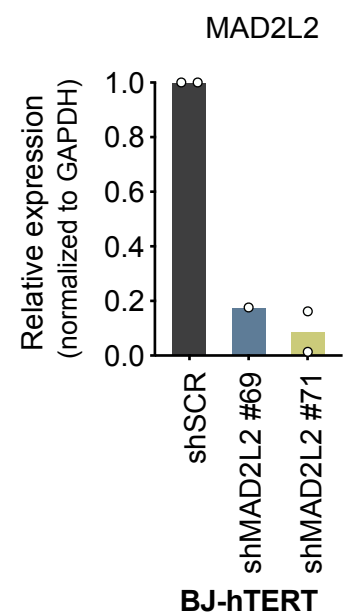**g**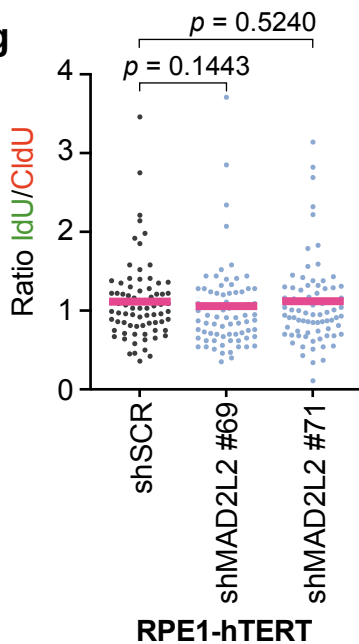**h**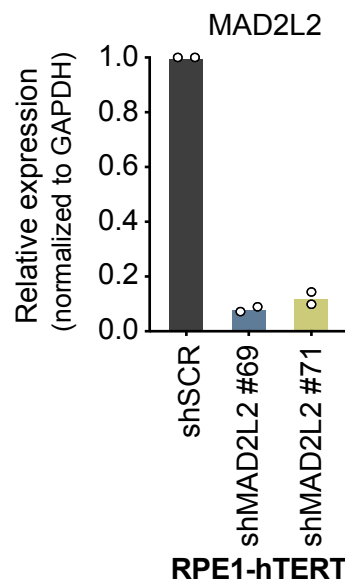**i**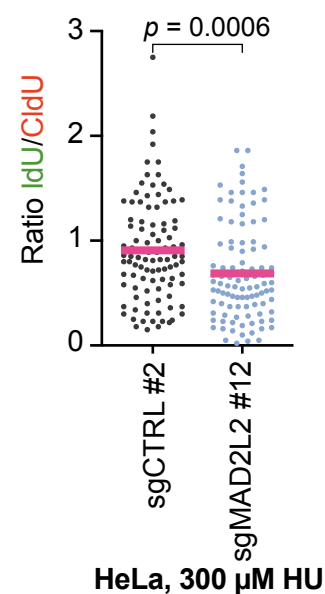

**Supplementary Figure 2 - related to Fig. 2. MAD2L2 protects stalled forks and promotes fork restart**

**a**, Schematic and quantification of replication fork restart assays. CldU pulse-labeled forks under 1 h HU treatment (4 mM) were measured in control (sgCTRL) and MAD2L2-depleted HeLa cells. Bars represent the mean  $\pm$  SD of three independent experiments. **b**, qPCR analysis of *BRCA1* expression in cells from Fig. 2e. Data were normalized to *GAPDH* expression. Bars represent the mean  $\pm$  SD. Each dot represents one of three independent experiments. **c**, Immunoblot analysis of MAD2L2 in HeLa cells transduced with the indicated shRNAs from Fig. 2e.  $\gamma$ -Tubulin serves as loading control. A representative blot of three independent experiments is shown. **d**, Schematic and quantification of fork degradation assays in control (sgCTRL) and MAD2L2-depleted HeLa cells. Cells were treated with 4 mM HU for 4 h before being harvested. **e**, Schematic and quantification of fork degradation assays in control (shSCR) and MAD2L2-depleted RPE1 hTERT *TP53*<sup>-/-</sup> cells. Cells were treated as indicated above (**d**). **f**, qPCR analysis of *MAD2L2* expression in cells from Fig. 2f. Data were normalized to *GAPDH* expression. Bars represent the mean of two independent experiments. **g**, Schematic and quantification of fork degradation assays in control (shSCR) and MAD2L2-depleted RPE1-hTERT cells. Cells were treated as indicated above (**d**). **h**, qPCR analysis of *MAD2L2* expression in cells from Fig. S2g. Data were normalized to *GAPDH* expression. Bars represent the mean. Each dot represents one of two independent experiments. **i**, Quantification of fork degradation assays in control (sgCTRL) and MAD2L2-depleted HeLa cells treated with 300  $\mu$ M HU for 4 h before being harvested. A representative fiber experiment from three independent biological replicates is shown for (**e**, **i**). A representative fiber experiment from two independent biological replicates is shown for (**d**, **g**). Pink bars in fiber plots represent the mean. Statistical analysis for the fiber assays in (**d**, **e**, **g**, **i**) was performed according to two-tailed Mann-Whitney test. Additional replicates and combined fiber plots are depicted in Extended Data 1 (or for Fig. S2d, an additional replicate is shown in Fig. S3f).

**a**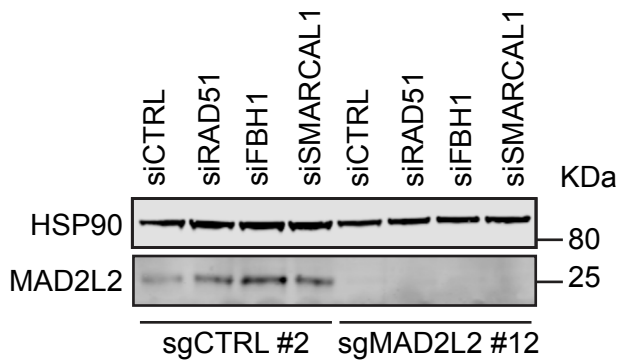**b**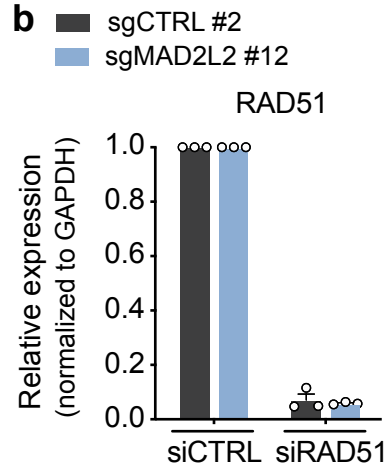**c**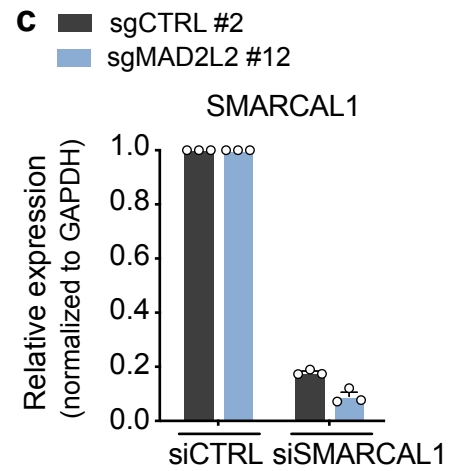**d**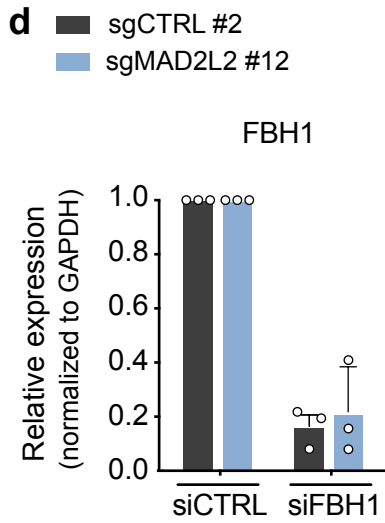**e**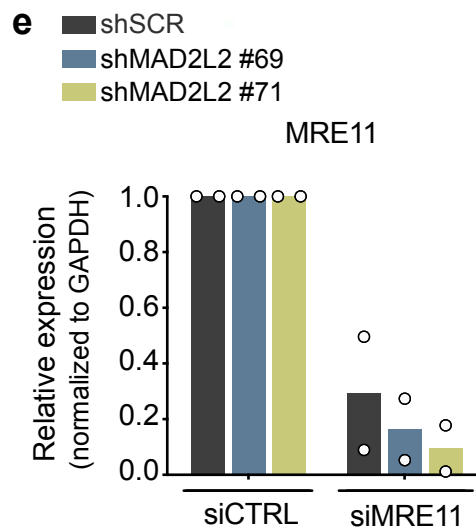**f**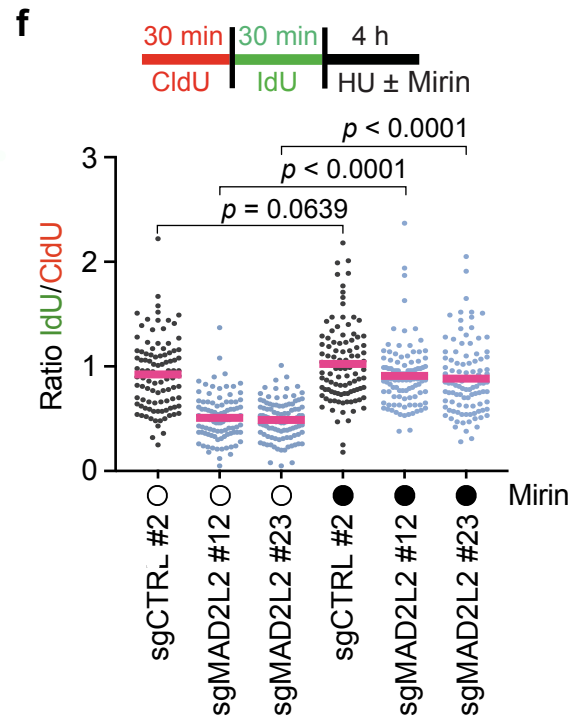**g**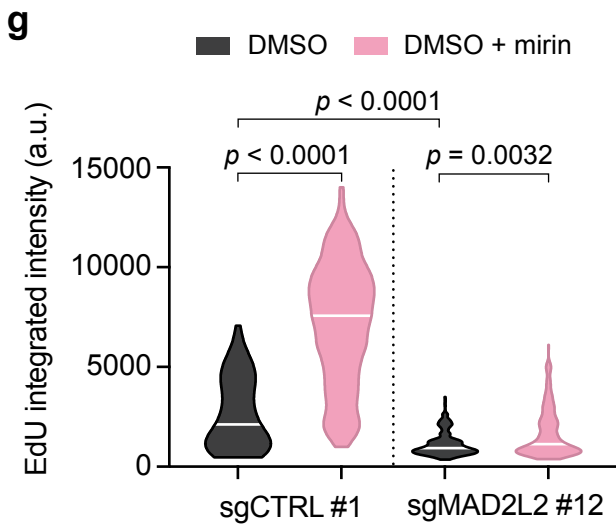

**Supplementary Figure 3 - related to Fig. 3. Inhibition of MRE11 and inactivation of RAD51 or SMARCAL1, but not FBH1, rescue fork degradation in MAD2L2-depleted cells**

**a**, Immunoblot analysis of MAD2L2 in cells from Fig. 3a. HSP90 serves as loading control. A representative blot of three independent experiments is shown. **b, c, d**, qPCR analysis of *RAD51* (**b**), *SMARCAL1* (**c**), and *FBH1* (**d**) expression in cells from Fig. 3a. Data were normalized to *GAPDH* expression. Bars represent the mean  $\pm$  SD. Each dot represents one of three independent experiments. **e**, qPCR analysis of *MRE11* expression in cells from Fig. 3b. Data were normalized to *GAPDH* expression. Bars represent the mean. Each dot represents one of two independent experiments. **f**, Schematic and quantification of fork degradation assays. Control (sgCTRL) and MAD2L2-depleted HeLa cells were treated with 4 mM HU  $\pm$  50  $\mu$ M mirin for 4 h. Open circles, no treatment; closed circles, treatment. A representative fiber experiment from two independent biological replicates is shown (with another replicate in Fig. S2d). **g**, Assessment of DNA synthesis rates in control and MAD2L2-depleted HeLa cells following treatment with or without 50  $\mu$ M mirin for 2 h. White bars represent the median of two independent experiments (each with 200 cells per condition). Statistical analysis was performed according to one-way Anova with Holm-Šidák's multiple comparison test. Pink bars in fiber plots represent the mean. Statistical analysis for the fiber assays in (**f**) was performed according to two-tailed Mann-Whitney test.

**a**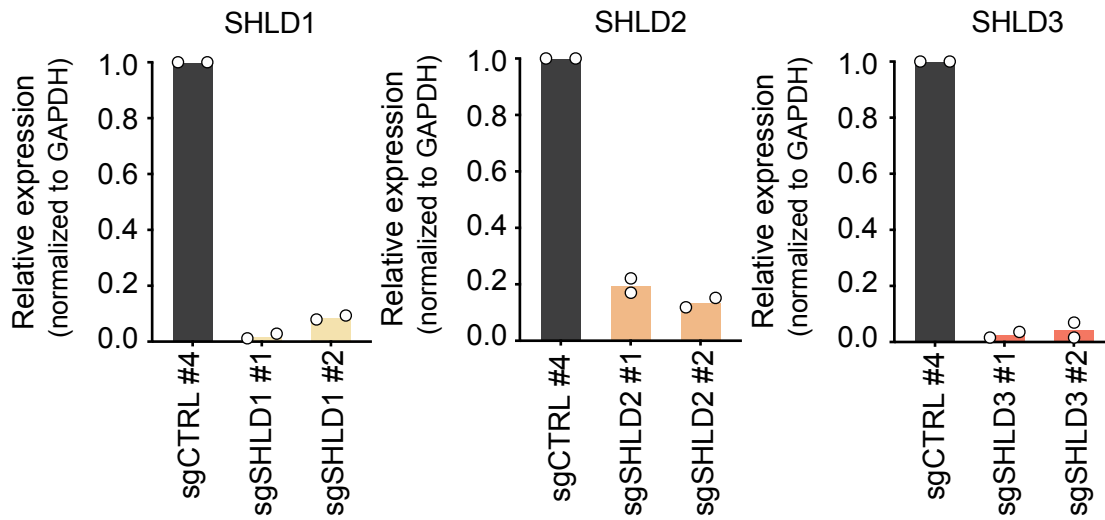**b**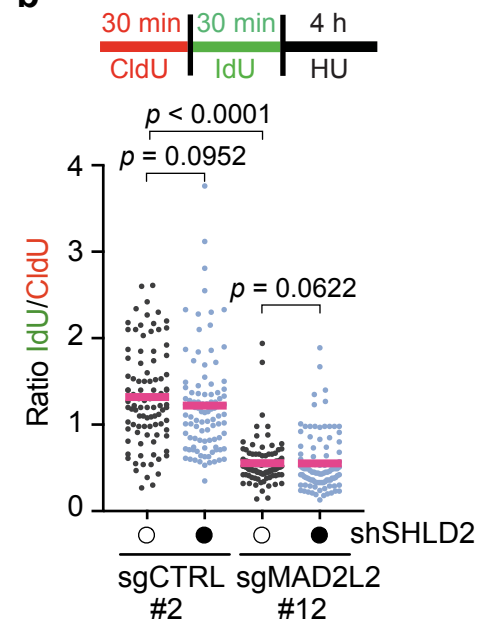**c**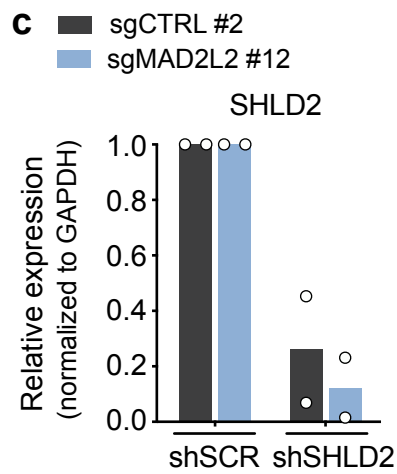**d**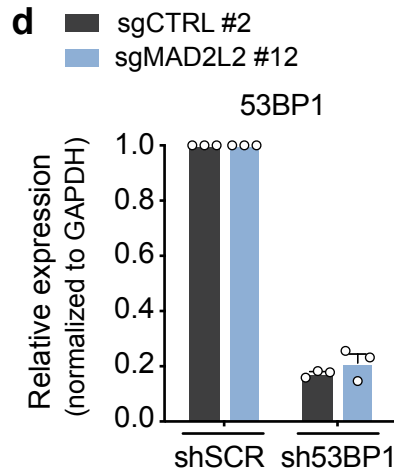**e**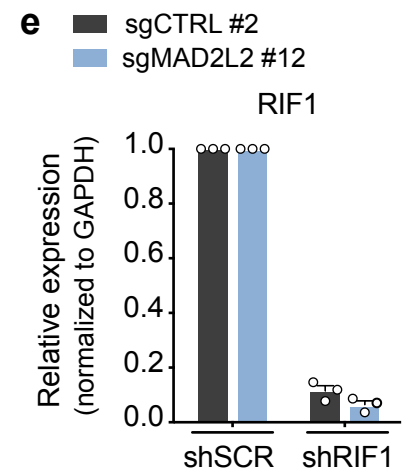**f**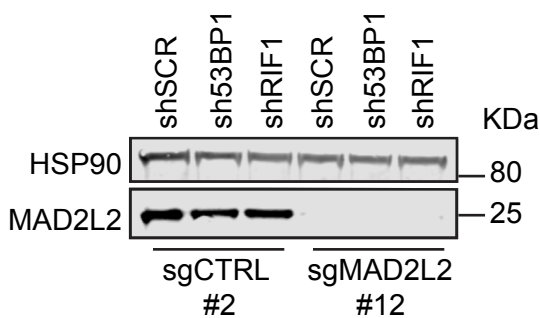**g**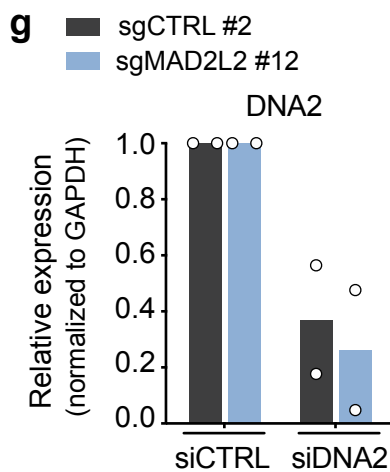



**Supplementary Figure 4 - related to Fig. 4. MAD2L2 suppresses degradation of stalled replication forks independently from shieldin and its upstream recruiter 53BP1/RIF1 at DSBs**

**a**, qPCR analysis of *SHLD1*, *SHLD2* and *SHLD3* expression in HeLa cells from Fig. 4a-d. Data were normalized to *GAPDH* expression. Bars represent the mean. Each dot represents one of two independent experiments. See Supplementary Table 3 for gene-editing efficiencies of the sgRNAs.

**b**, Schematic and quantification of fork degradation assays in control (sgCTRL) and MAD2L2-depleted HeLa cells transduced with a shRNA targeting SHLD2. Cells were treated with 4 mM HU for 4 h before being harvested. Open circles, control shRNA; closed circles, SHLD2 shRNA. A representative fiber experiment from two independent biological replicates is shown. Pink bars in fiber plots represent the mean. Statistical analysis for the fiber assays was performed according to two-tailed Mann-Whitney test. Additional replicates and combined fiber plots are depicted in Extended Data 1.

**c**, qPCR analysis of *SHLD2* expression in cells from Fig. S4b. Bars represent the mean. Each dot represents one of two independent experiments.

**d, e**, qPCR analysis of *53BP1* (**d**) or *RIF1* (**e**) expression in cells from Fig. 4e. Bars represent the mean  $\pm$  SD. Each dot represents one of three independent experiments.

**f**, Immunoblot analysis of MAD2L2 in cells from Fig. 4e. HSP90 serves as loading control. A representative blot of three independent experiments is shown.

**g**, qPCR analysis of *DNA2* expression in cells from Fig. 4f. Bars represent the mean. Each dot represents one of two independent experiments.

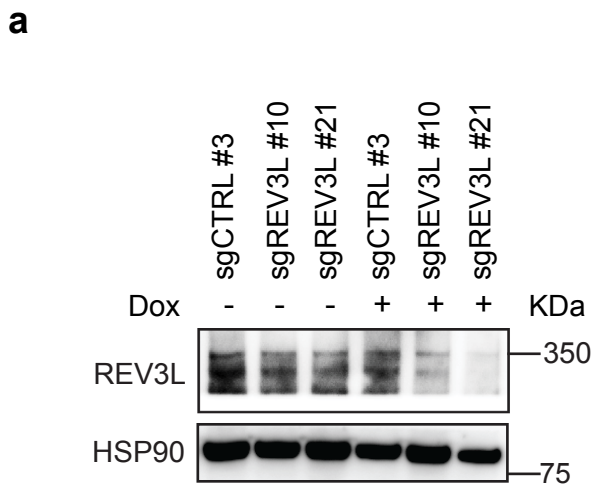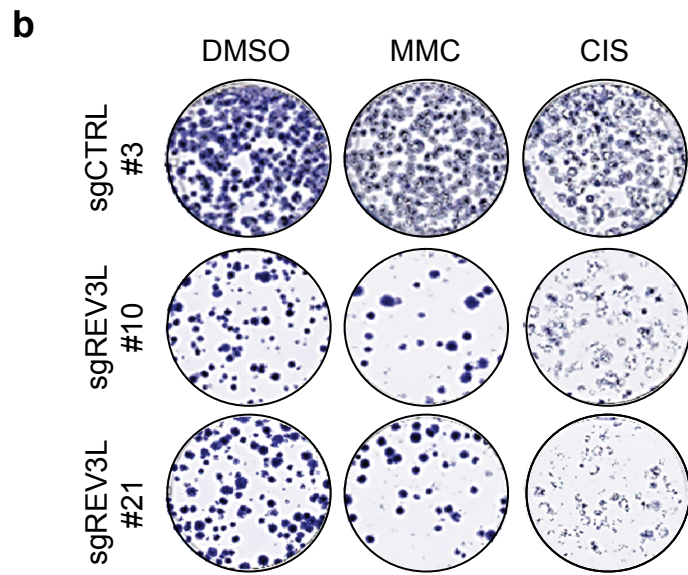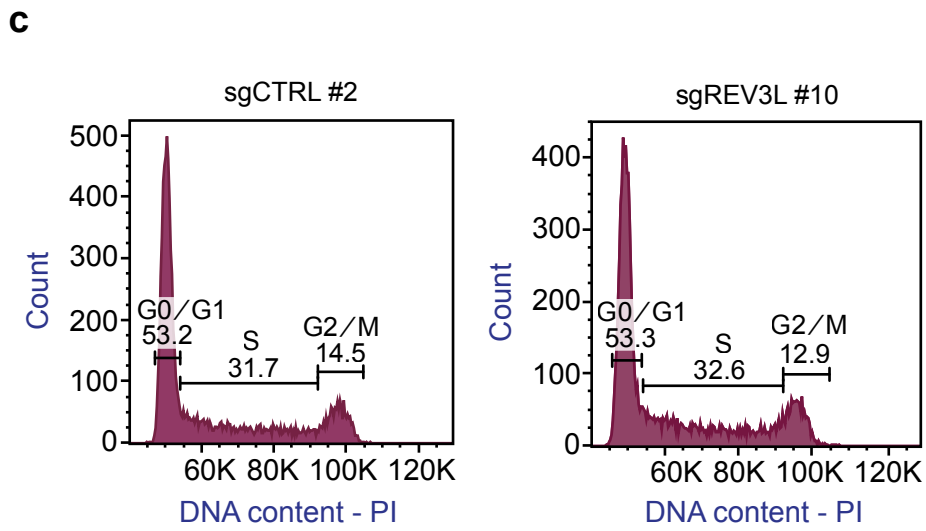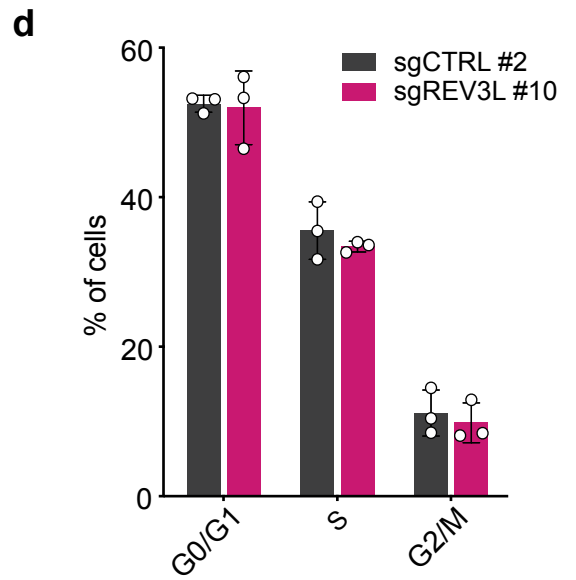

**Supplementary Figure 5 - related to Fig. 5. Validation of REV3L loss and assessment of cell cycle distribution in conditional *REV3L* knockout cells**

**a**, Immunoblot analysis of REV3L in HeLa cells stably expressing doxycycline-inducible sgRNAs, after 6 days of doxycycline treatment. HSP90 serves as loading control. A representative blot of three independent experiments is shown. **b**, Representative images of survival assay in cells from Fig 5a. **c**, Example of the gating strategy for cell cycle analysis performed on control (sgCTRL) and REV3L-depleted HeLa cells and shown in **(d)**. **d**, Percentage of G1-, S- and G2-phase cells, determined by propidium iodide (PI) staining and FACS analysis, after 6 days of doxycycline treatment. Bars represent the mean  $\pm$  SD. Each dot represents one of three independent experiments.

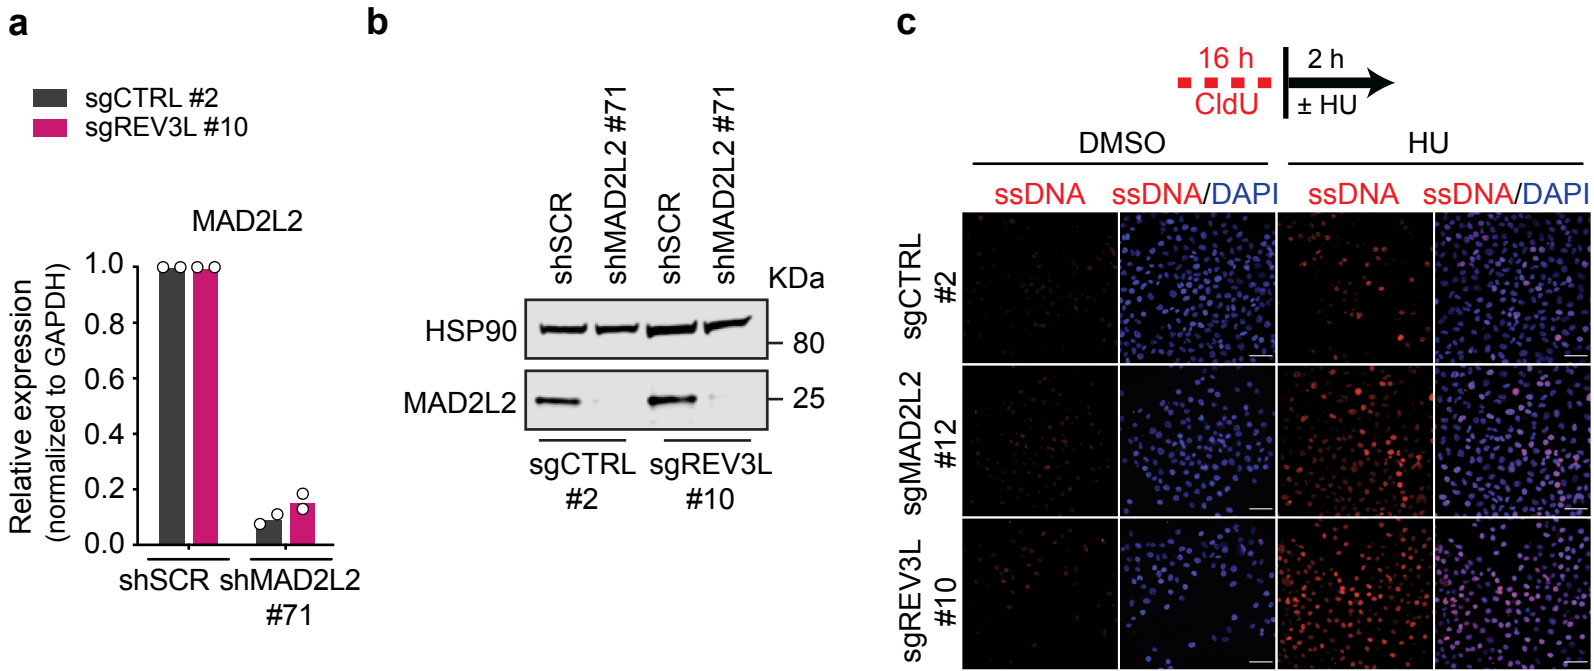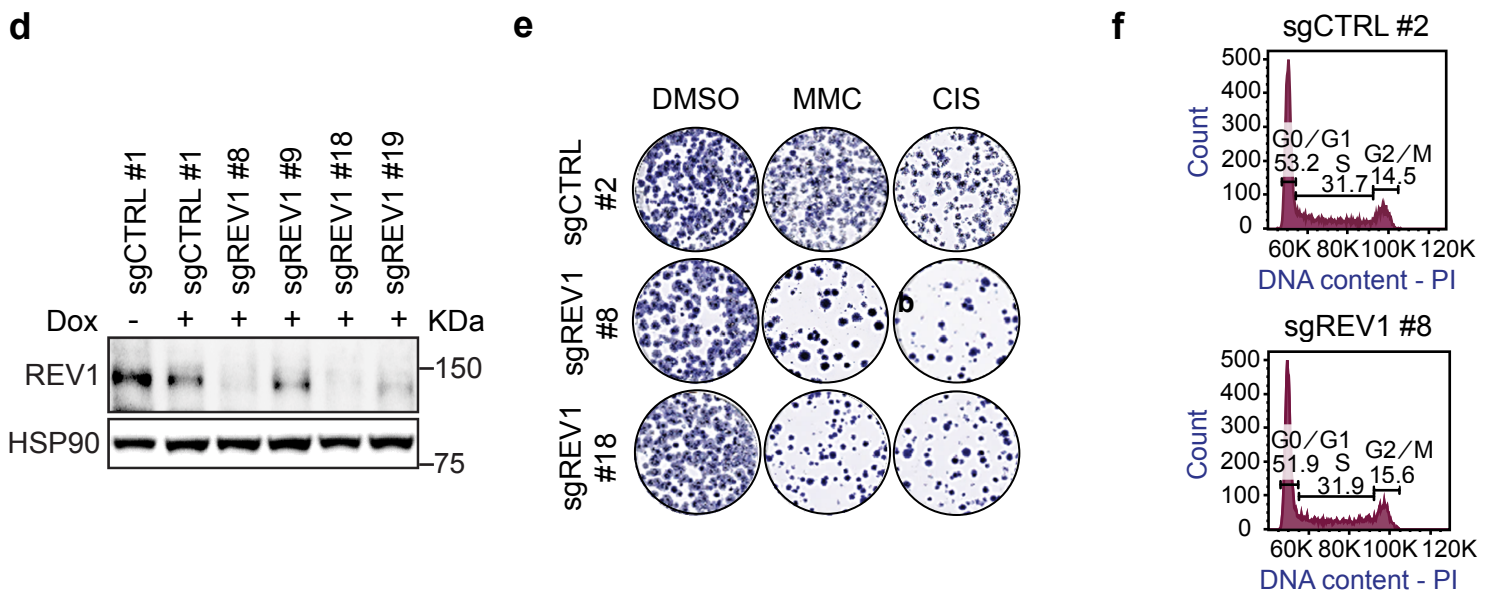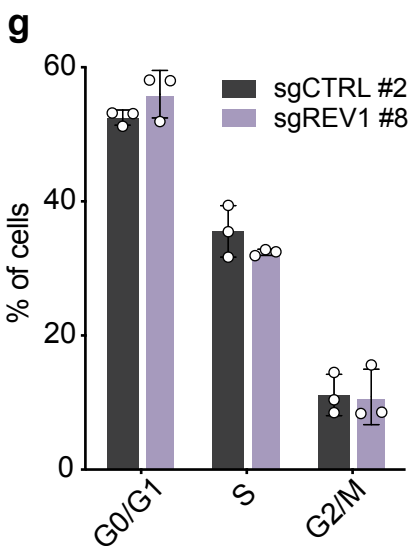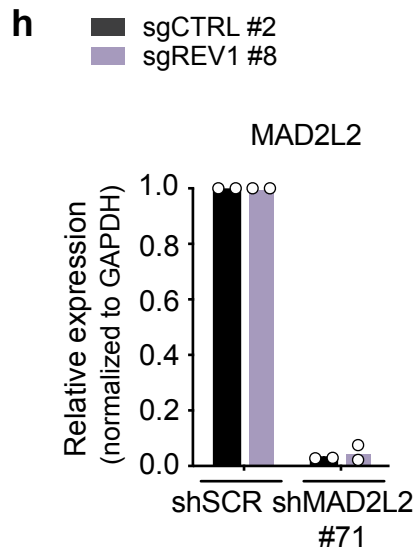

**Supplementary Figure 6 - related to Fig. 6. MAD2L2 protects stalled replication forks and prevents ssDNA accumulation in a REV3L- and REV1-dependent manner**

**a**, qPCR analysis of *MAD2L2* expression in cells from Fig. 6a. Data were normalized to *GAPDH* expression. Bars represent the mean. Each dot represents one of two independent experiments. **b**, Immunoblot analysis of MAD2L2 in cells from Fig. 6a. HSP90 serves as loading control. A representative blot of two independent experiments is shown. **c**, Schematic and representative images of ssDNA-positive cells from Fig. 6b. Following initial labeling with CldU (red) for 16 h, cells were treated with or without 4 mM HU for 2 h. Scale bar, 50  $\mu$ M. Quantification of three biological replicates is in (**6b**). **d**, Immunoblot analysis of REV1 in HeLa cells stably expressing doxycycline-inducible sgRNAs, after 6 days of doxycycline treatment. HSP90 serves as loading control. A representative blot of three independent experiments is shown. **e**, Representative images of survival assays in cells from Fig. 6c. **f**, Example of the gating strategy for cell cycle analysis performed on control (sgCTRL) and REV1-depleted HeLa cells and shown in (**g**). **g**, Percentage of G1-, S- and G2-phase cells, determined by propidium iodide (PI) staining and FACS analysis, after 6 days of doxycycline treatment. **h**, qPCR analysis of *MAD2L2* expression in cells from Fig. 6h. Data were normalized to *GAPDH* expression. Bars represent the mean. Each dot represents one of two independent experiments. **i**, Immunoblot analysis of MAD2L2 and REV1 in cells from Fig. 6h. HDAC1 and HSP90 serve as loading controls. A representative blot of two independent experiments is shown. Asterisk indicates a non-specific band running just below endogenous REV1, double asterisk indicates a degradation or alternative REV1 product that (next to full-length REV1) is lost upon CRISPR knockout of REV1.

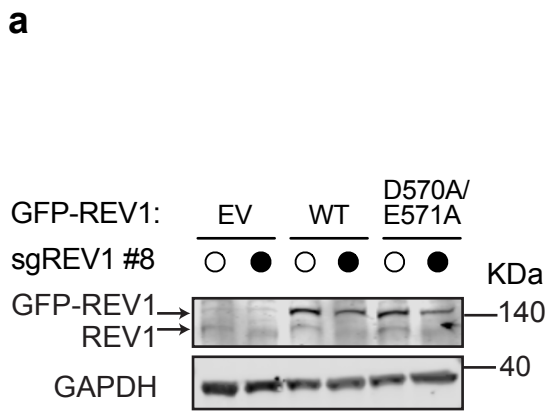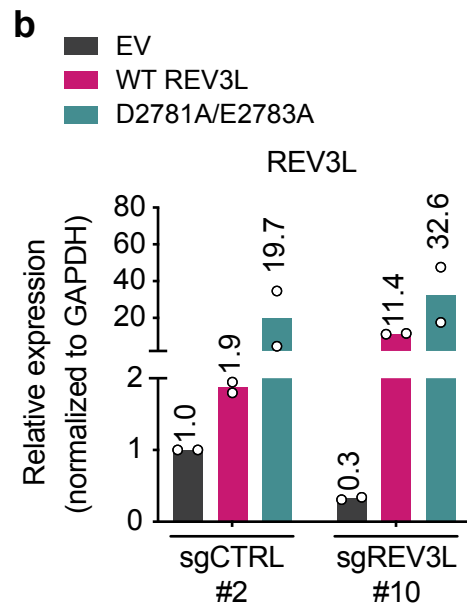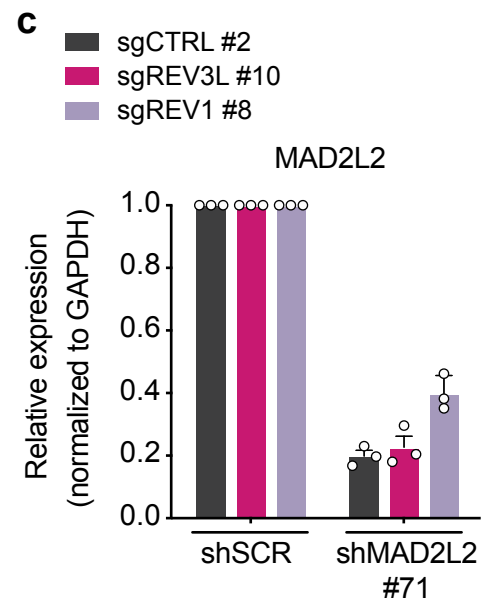

**Supplementary Figure 7 - related to Fig. 7. Expression of wildtype or mutant REV1/REV3L and depletion of MAD2L2 in REV1/REV3L knockout cells to assess fork degradation and chromosomal instability**

**a**, Immunoblot analysis of REV1 in HeLa cells from Fig. 7a. GAPDH serves as loading control. A representative blot of three independent experiments is shown. **b**, qPCR analysis of *REV3L* expression in cells from Fig. 7b. Data were normalized to GAPDH expression. Bars represent the mean. Each dot represents one of two independent experiments. **c**, qPCR analysis of *MAD2L2* expression in cells from Fig. 7c. Data were normalized to GAPDH expression. Bars represent the mean  $\pm$  SD. Each dot represents one of three independent experiments.

**Supplementary References**

- 1 Bhat, A., Wu, Z., Maher, V. M., McCormick, J. J. & Xiao, W. Rev7/Mad2B plays a critical role in the assembly of a functional mitotic spindle. *Cell Cycle* **14**, 3929-3938, doi:10.1080/15384101.2015.1120922 (2015).

# Extended Data 1: Additional fiber replicates and combined fiber plots of all replicates

## Extended Data 1a - related to Fig. 2c

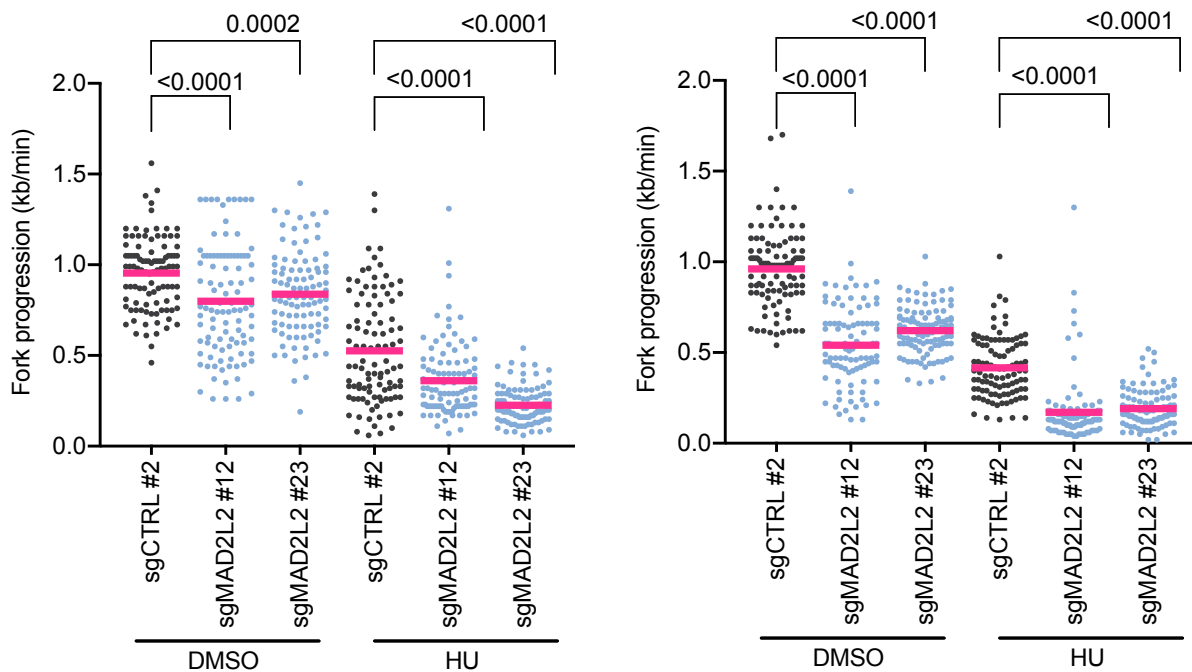

### Additional replicates

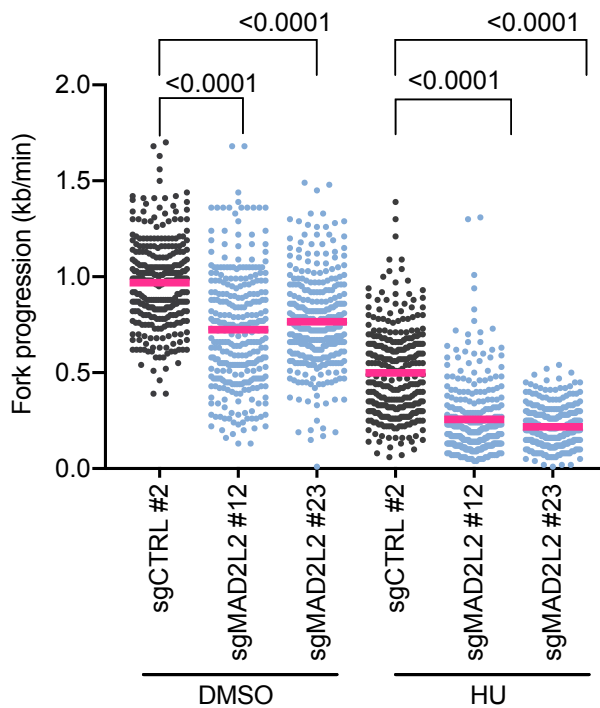

### All replicates combined



# Extended Data 1: Additional fiber replicates and combined fiber plots of all replicates

## Extended Data 1b - related to Fig. 2e

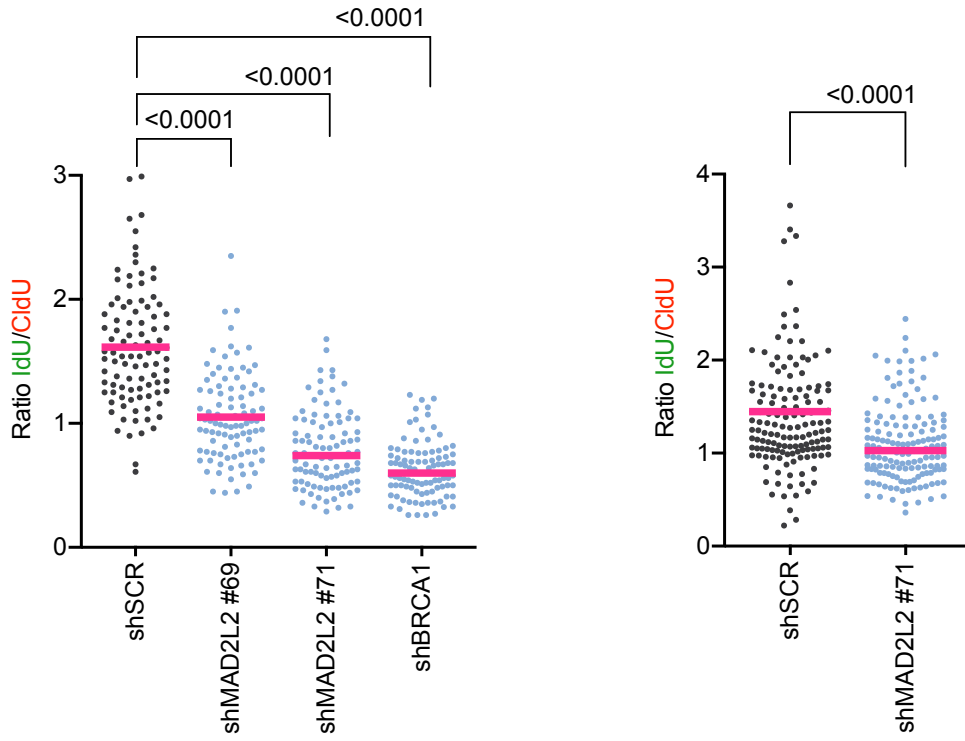

*Additional replicates*

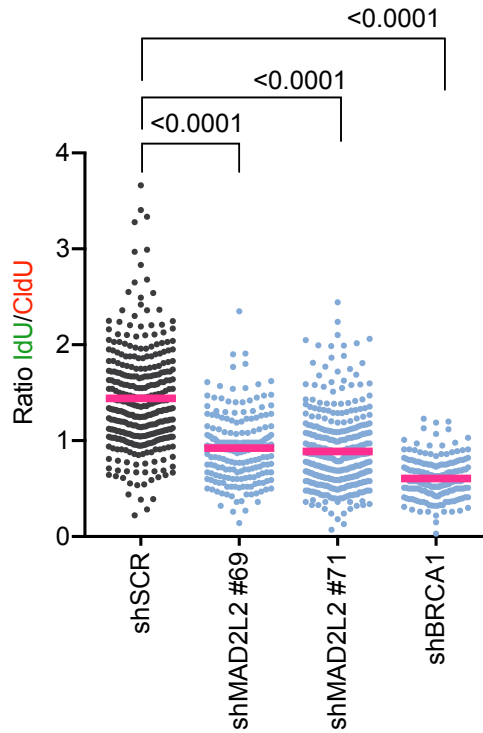

*All replicates combined*

# Extended Data 1: Additional fiber replicates and combined fiber plots of all replicates

## Extended Data 1c - related to Fig. 2f

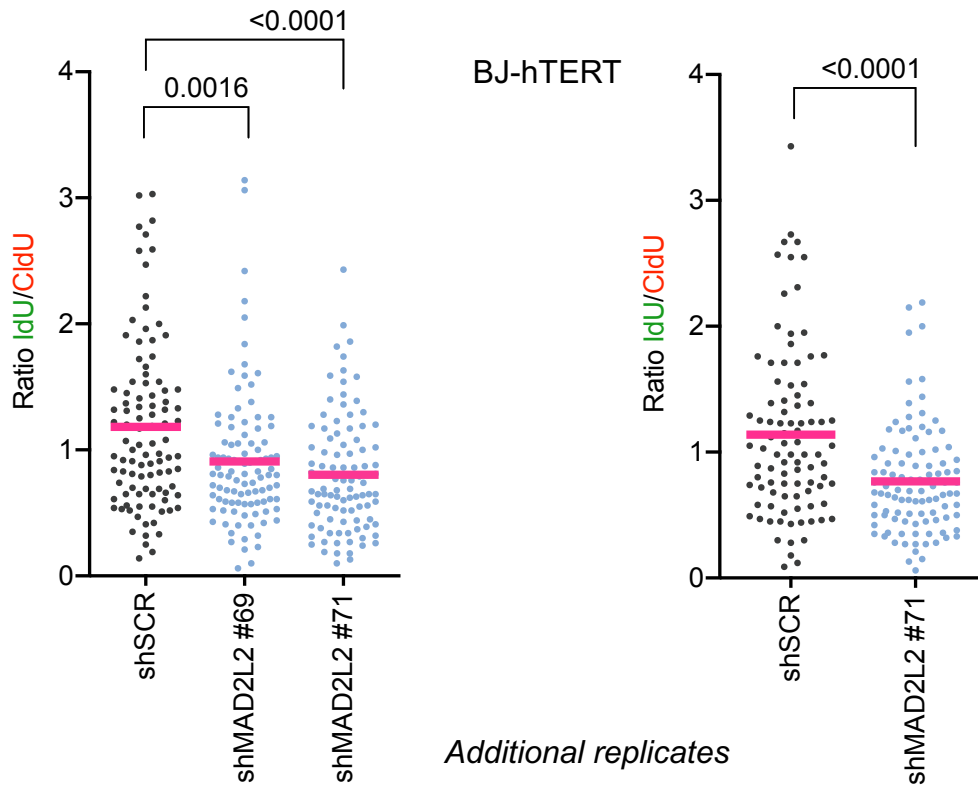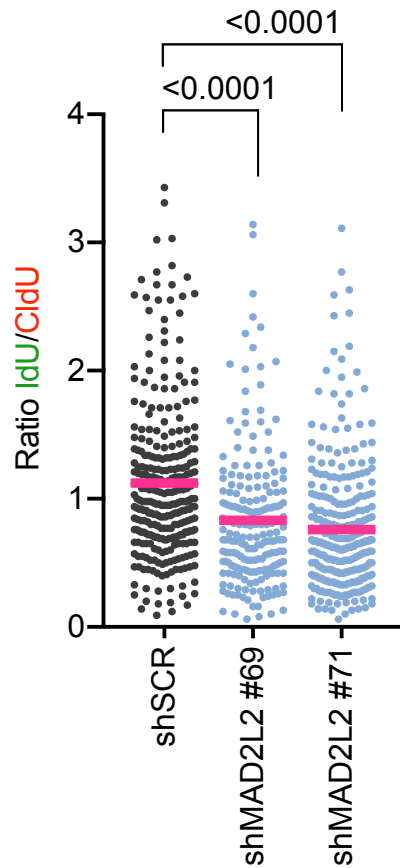

All replicates combined

# Extended Data 1: Additional fiber replicates and combined fiber plots of all replicates

## Extended Data 1d - related to Fig. 2i

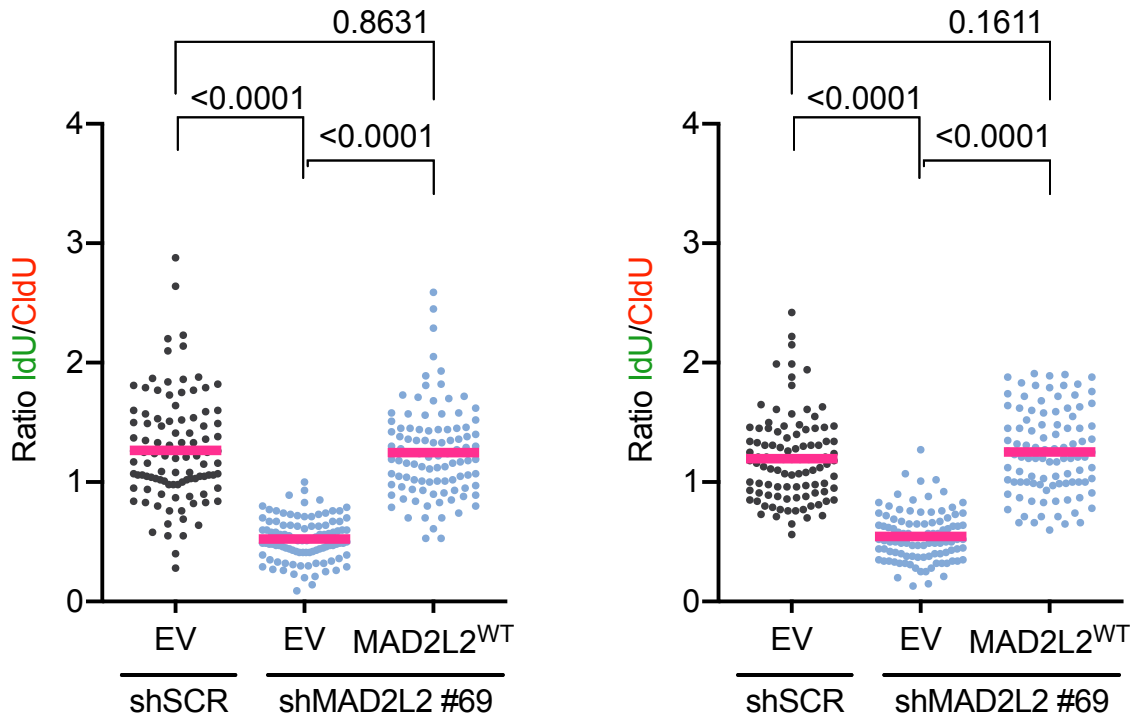

*Additional replicates*

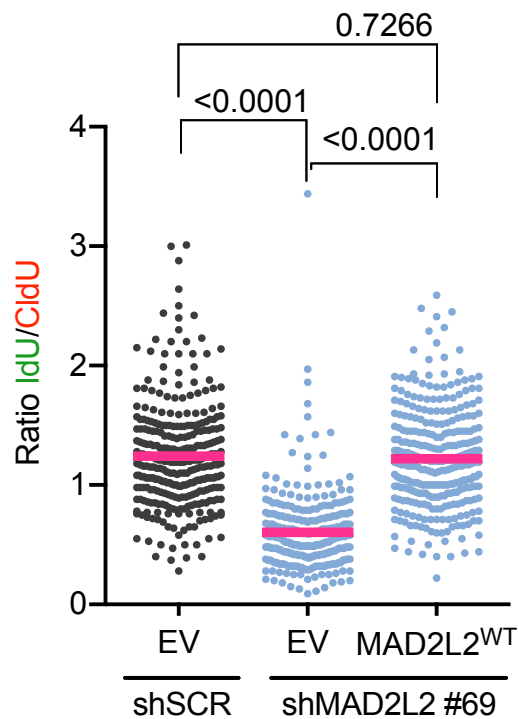

*All replicates combined*

# Extended Data 1: Additional fiber replicates and combined fiber plots of all replicates

## Extended Data 1e - related to Fig. S2f

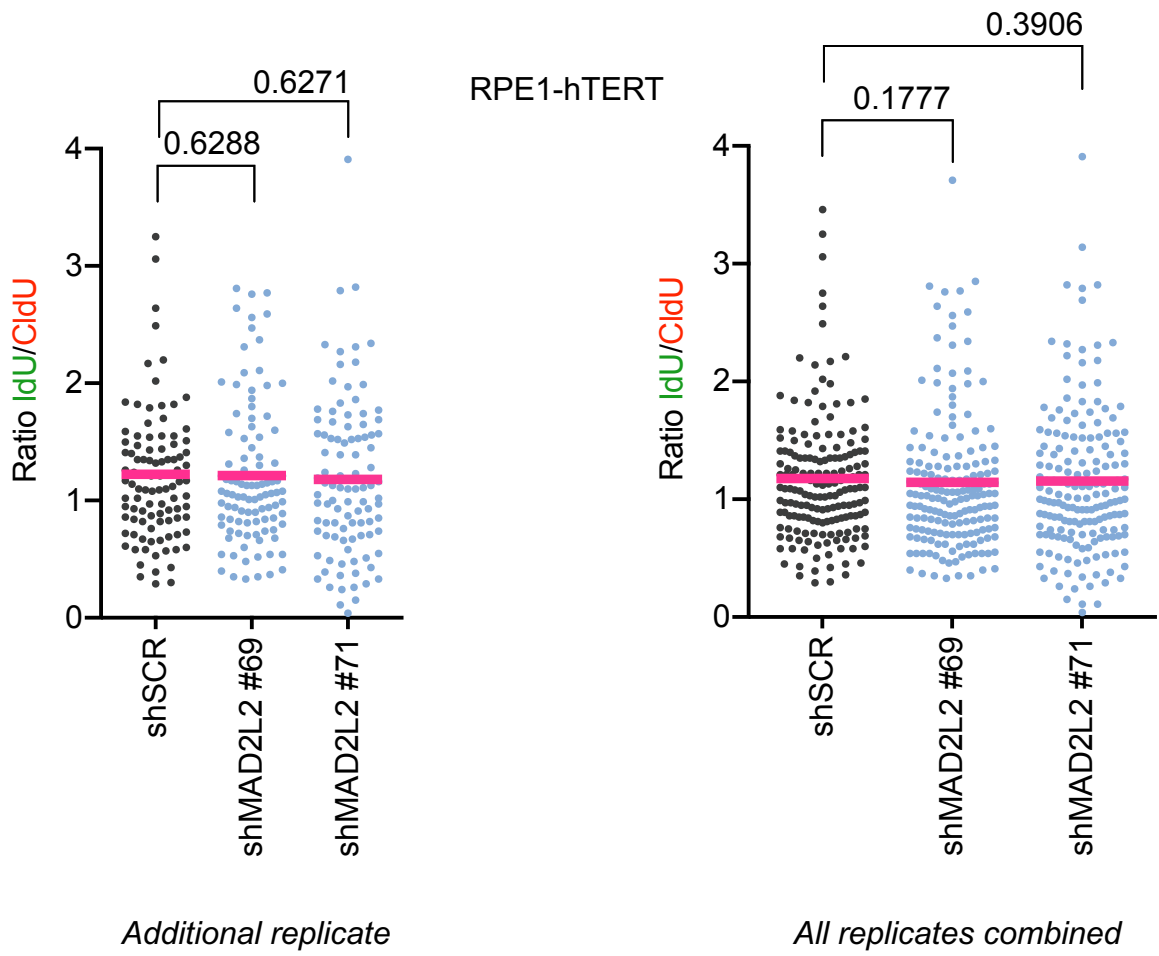

# Extended Data 1: Additional fiber replicates and combined fiber plots of all replicates

## Extended Data 1f - related to Fig. S2h

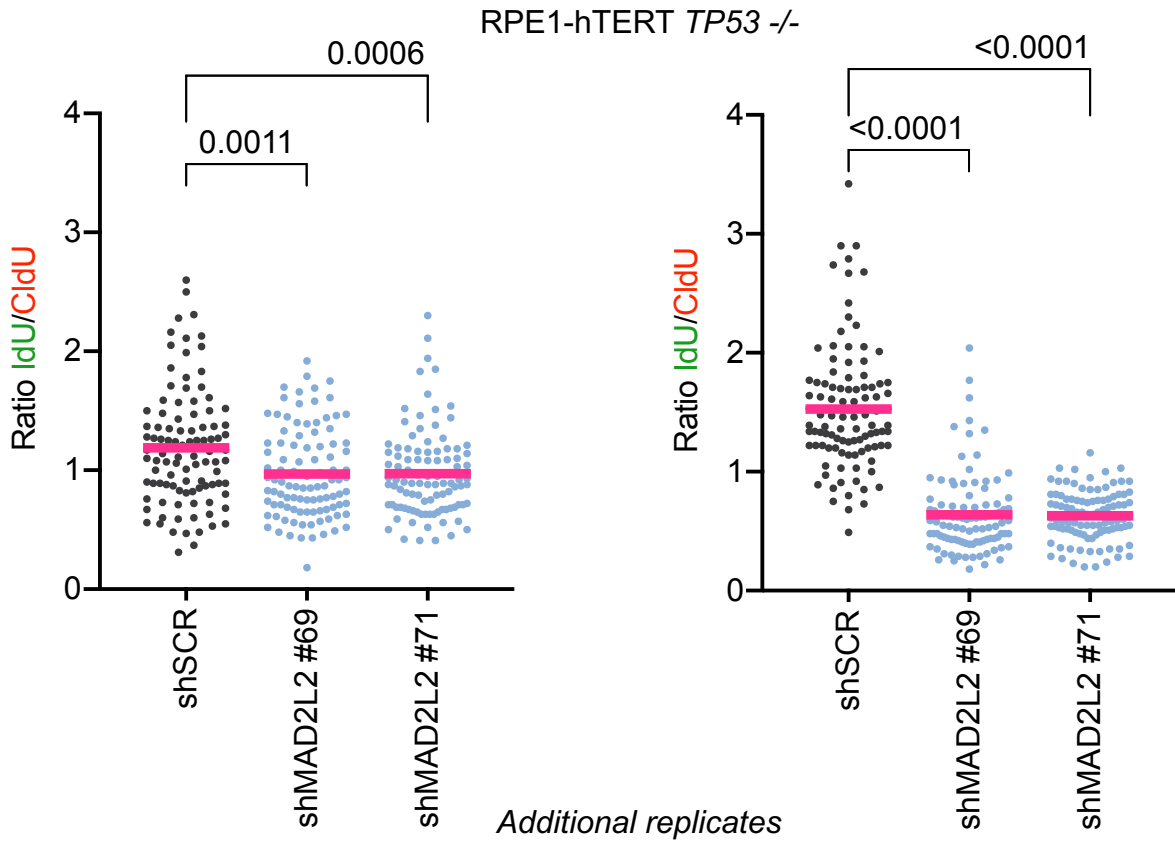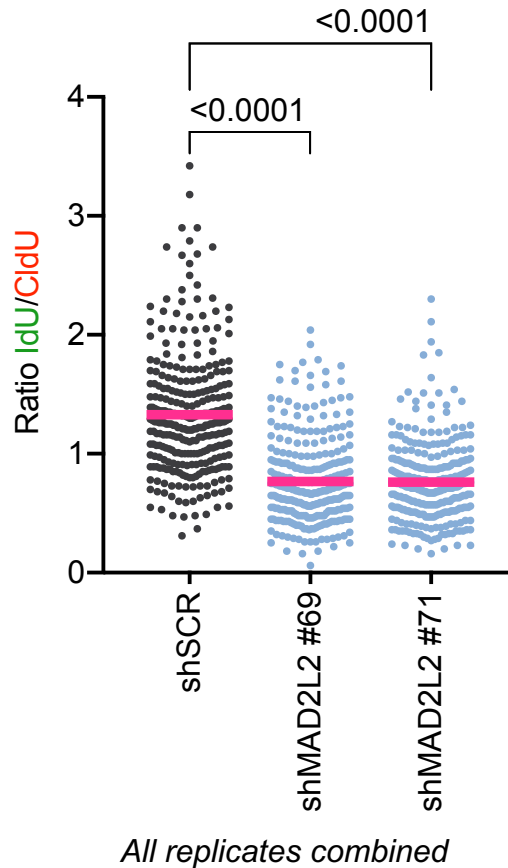

# Extended Data 1: Additional fiber replicates and combined fiber plots of all replicates

## Extended Data 1g - related to Fig. S2i

HeLa, 300  $\mu$ M HU

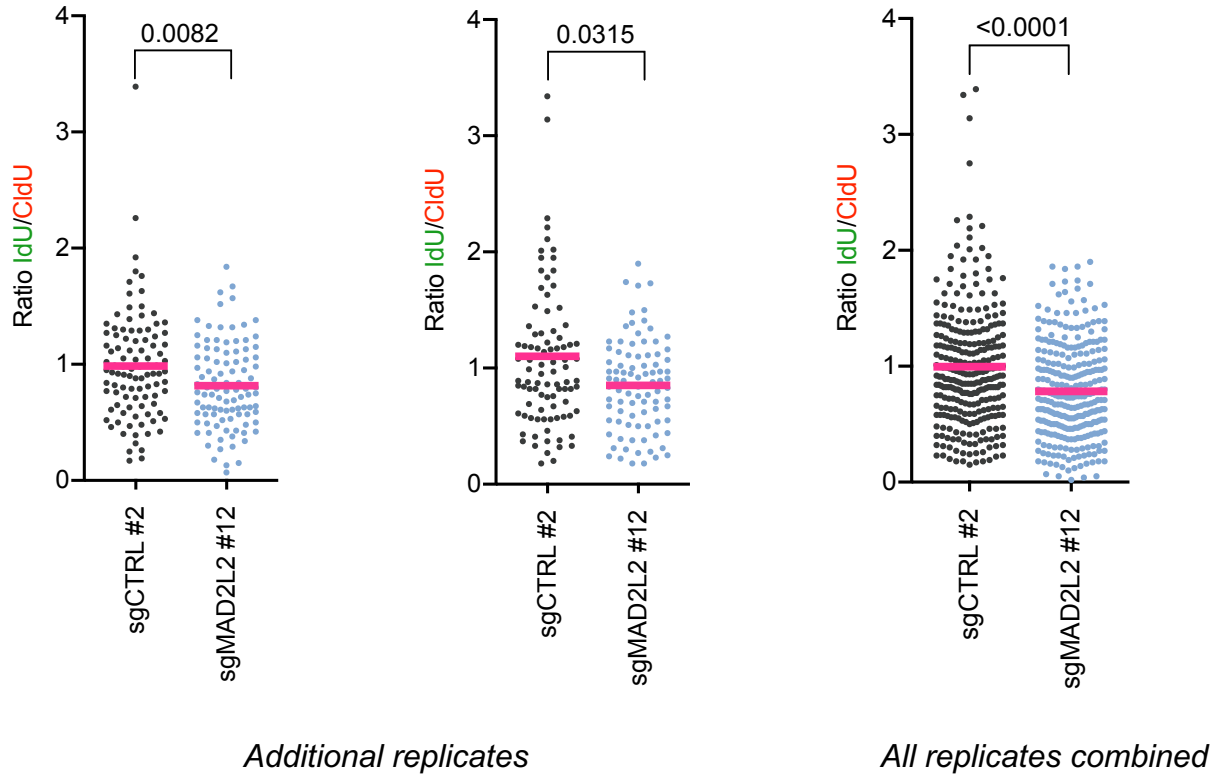

# Extended Data 1: Additional fiber replicates and combined fiber plots of all replicates

## Extended Data 1h - related to Fig. 3a

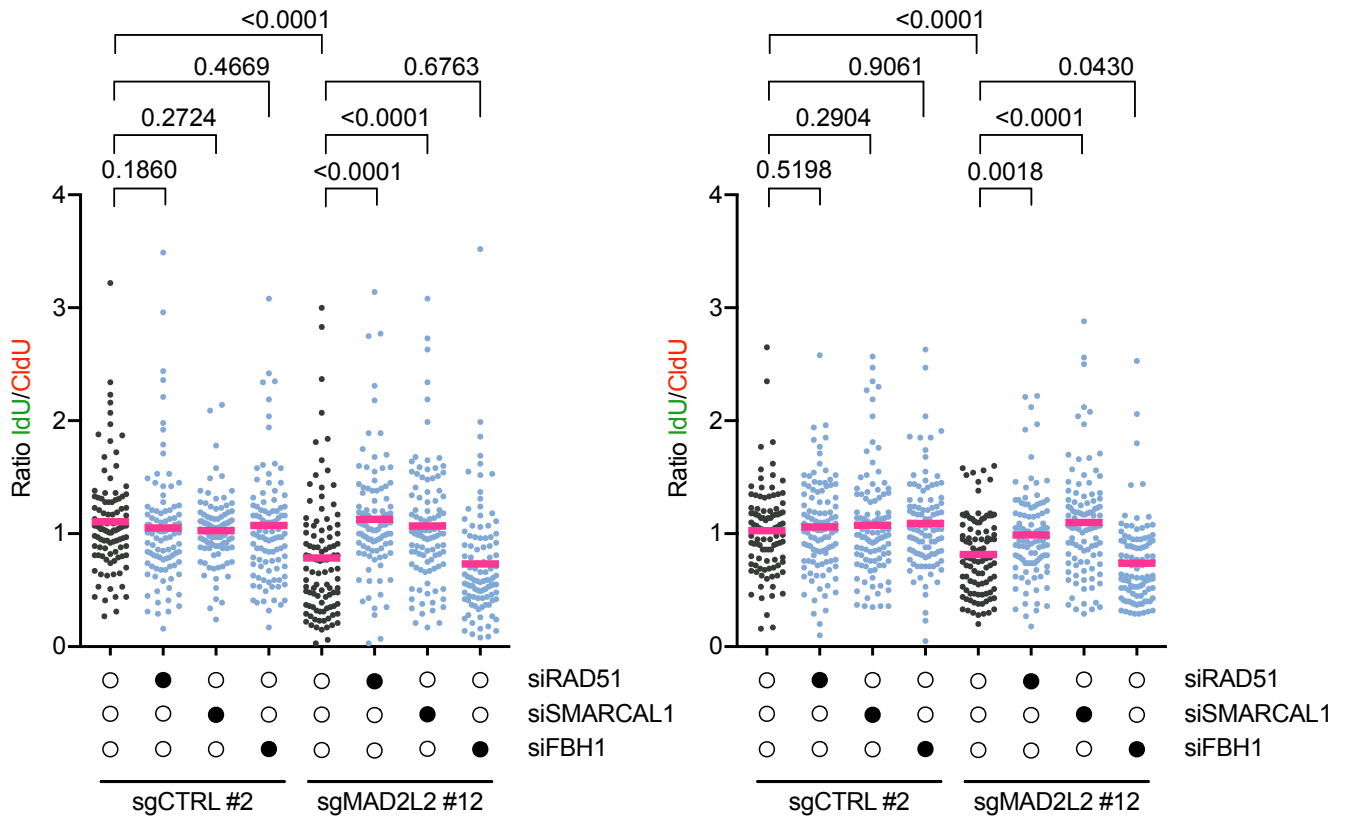

*Additional replicates*

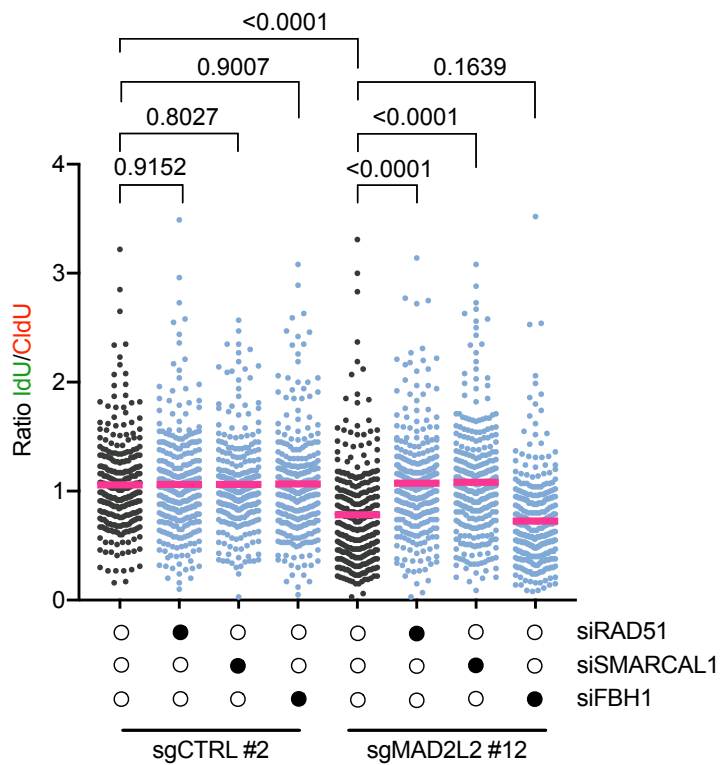

*All replicates combined*

# Extended Data 1: Additional fiber replicates and combined fiber plots of all replicates

## Extended Data 1i - related to Fig. 3b

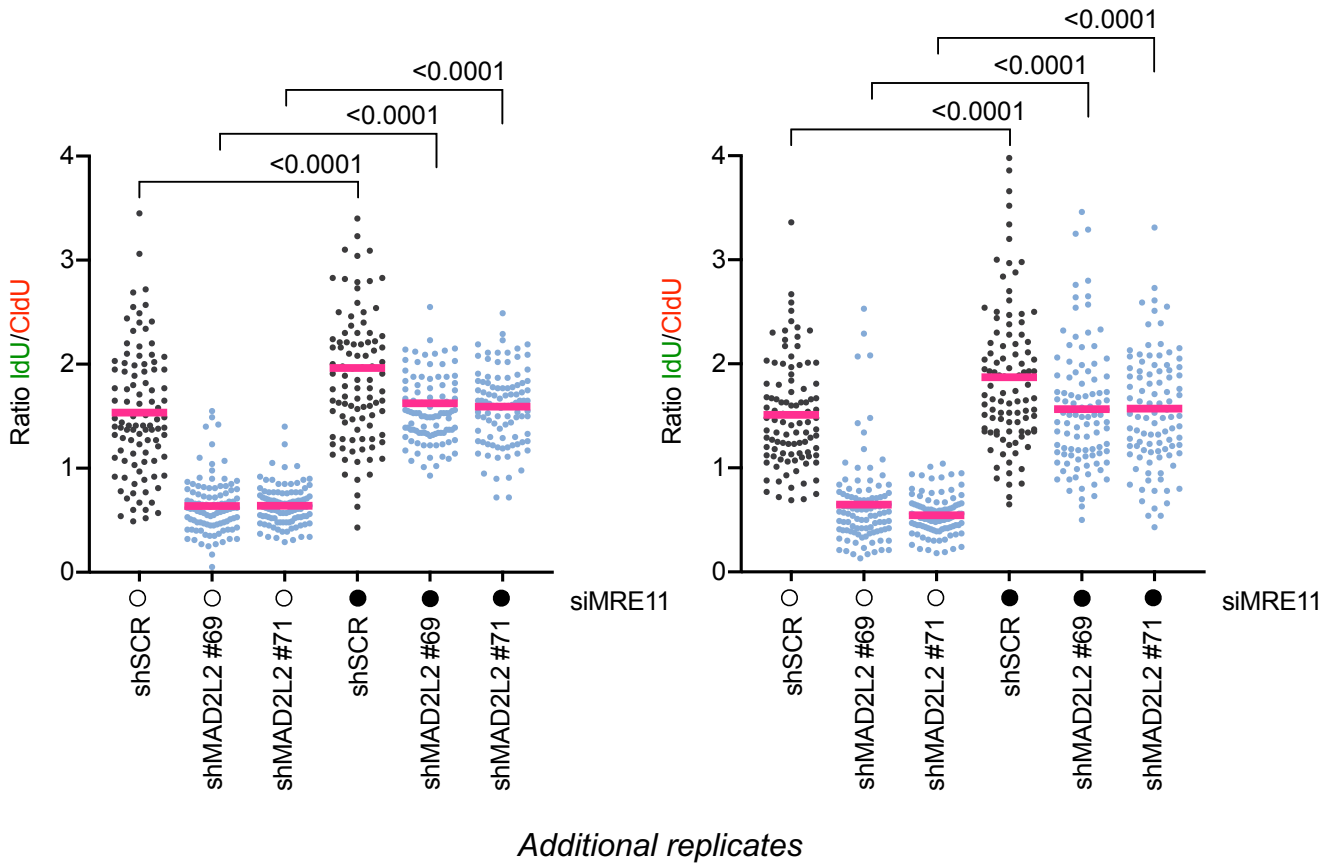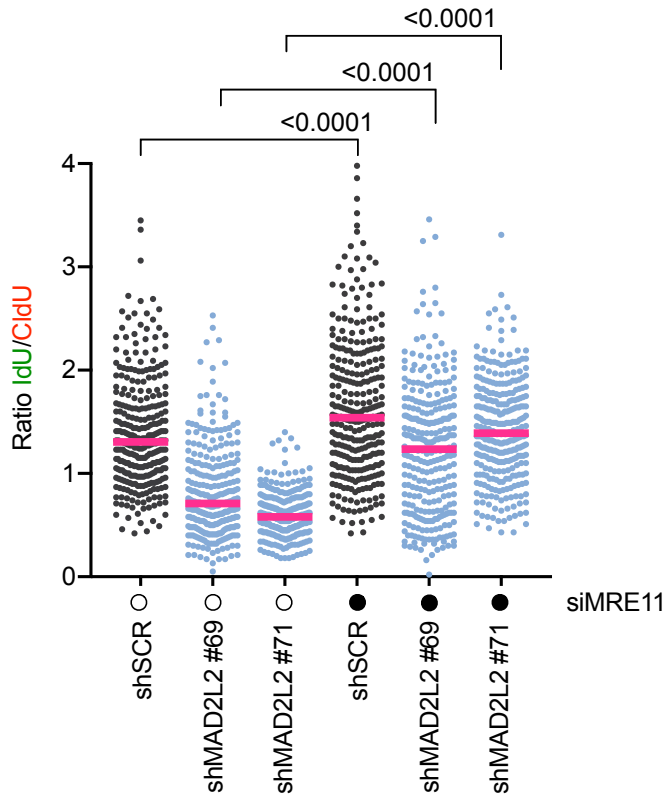

All replicates combined



# Extended Data 1: Additional fiber replicates and combined fiber plots of all replicates

## Extended Data 1j - related to Fig. 3c

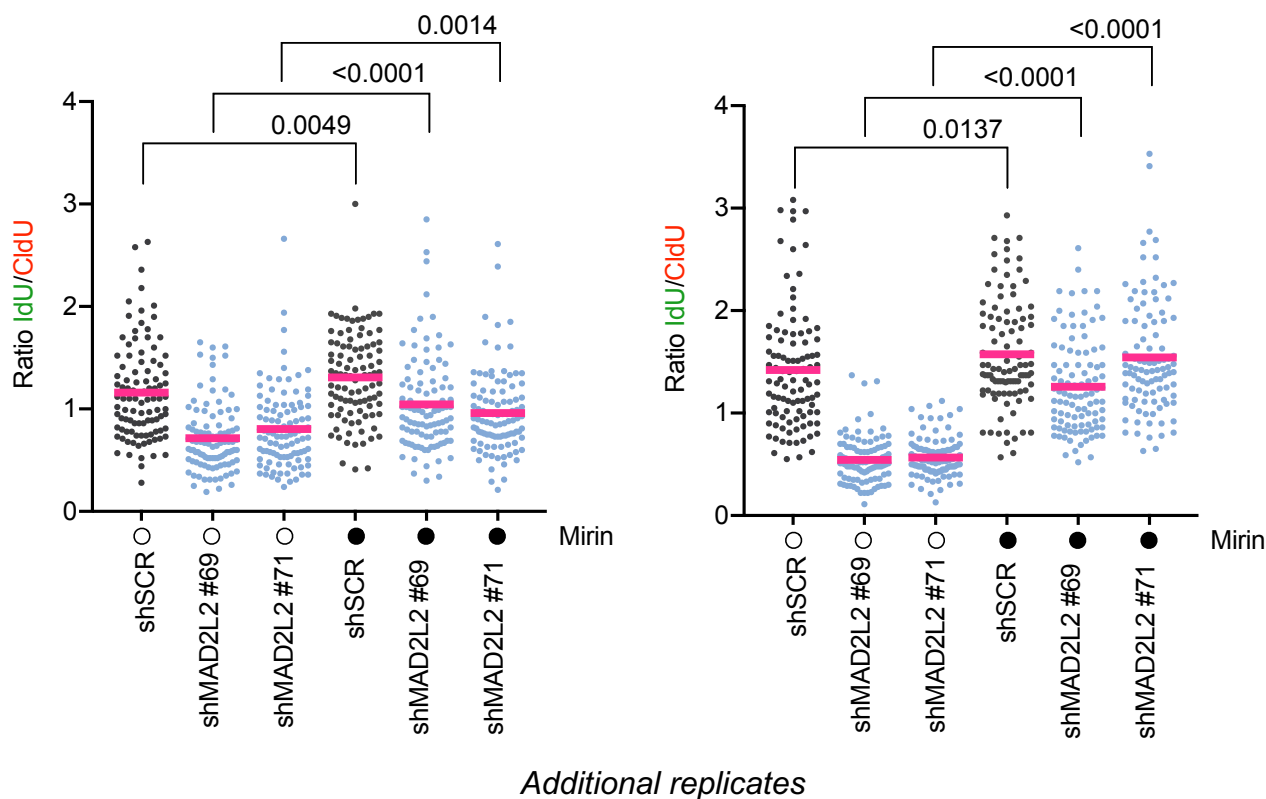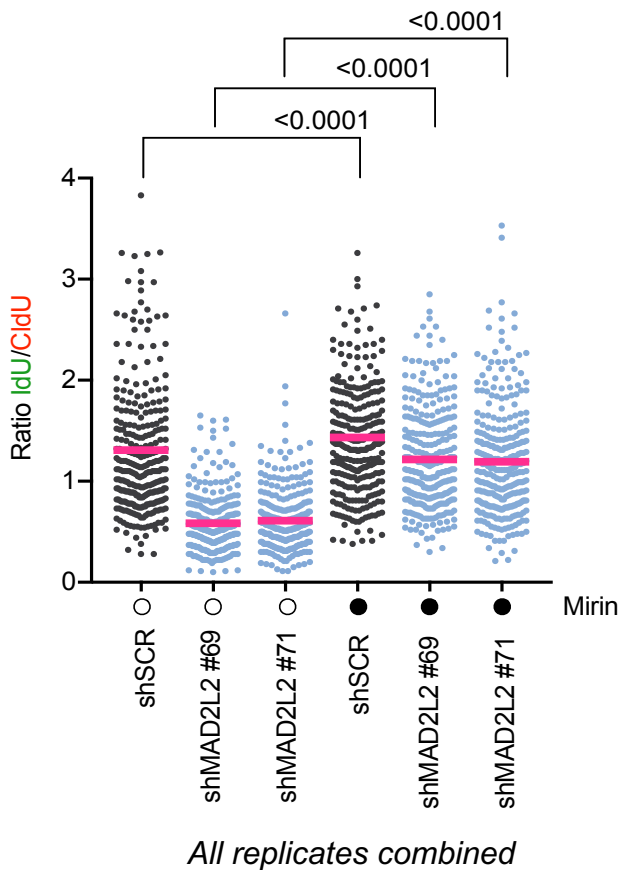

# Extended Data 1: Additional fiber replicates and combined fiber plots of all replicates

## Extended Data 1k - related to Fig. 4d

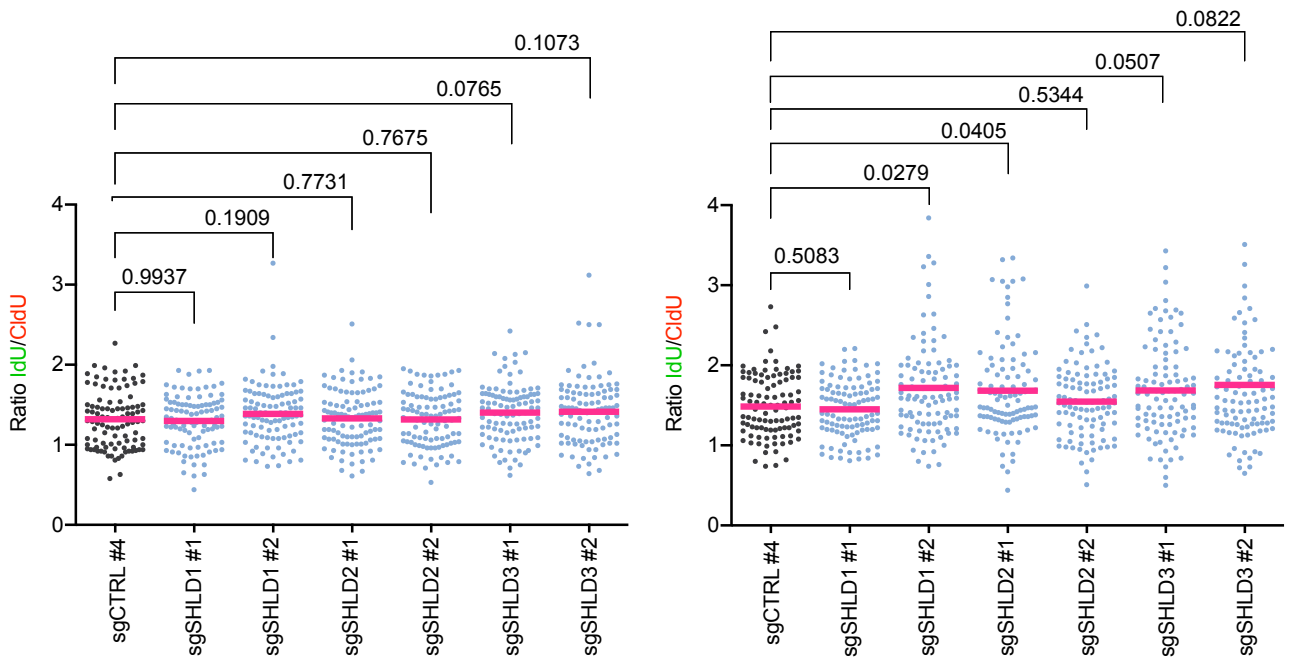

*Additional replicates*

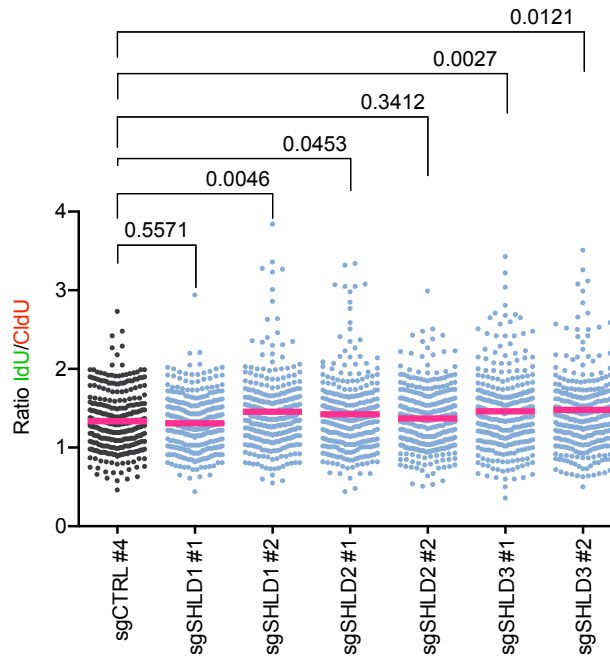

*All replicates combined*

# Extended Data 1: Additional fiber replicates and combined fiber plots of all replicates

## Extended Data 1I - related to Fig. 4e

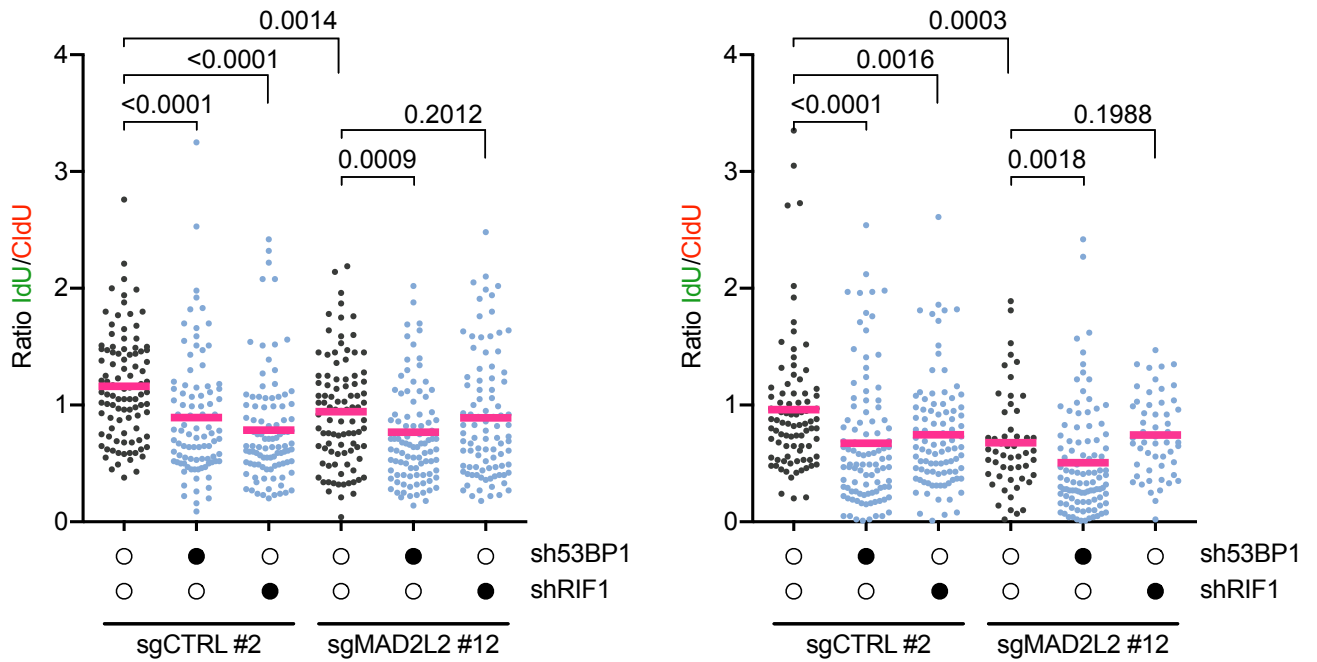

*Additional replicates*

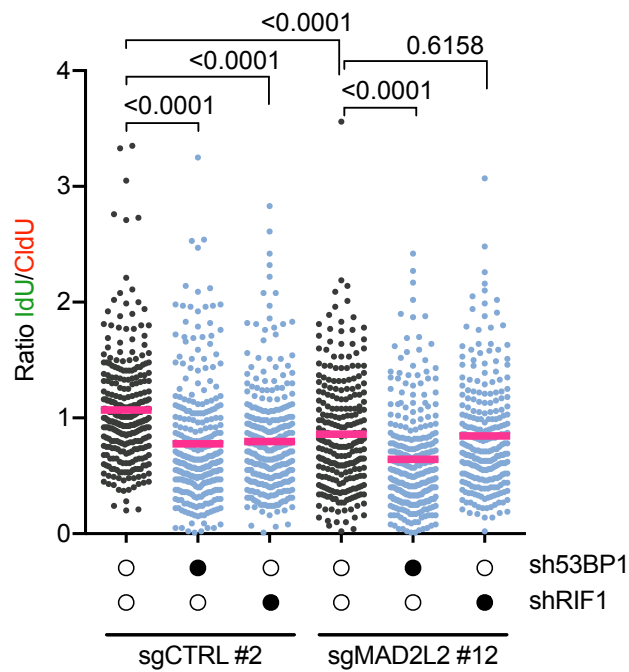

*All replicates combined*

# Extended Data 1: Additional fiber replicates and combined fiber plots of all replicates

## Extended Data 1m - related to Fig. 4f

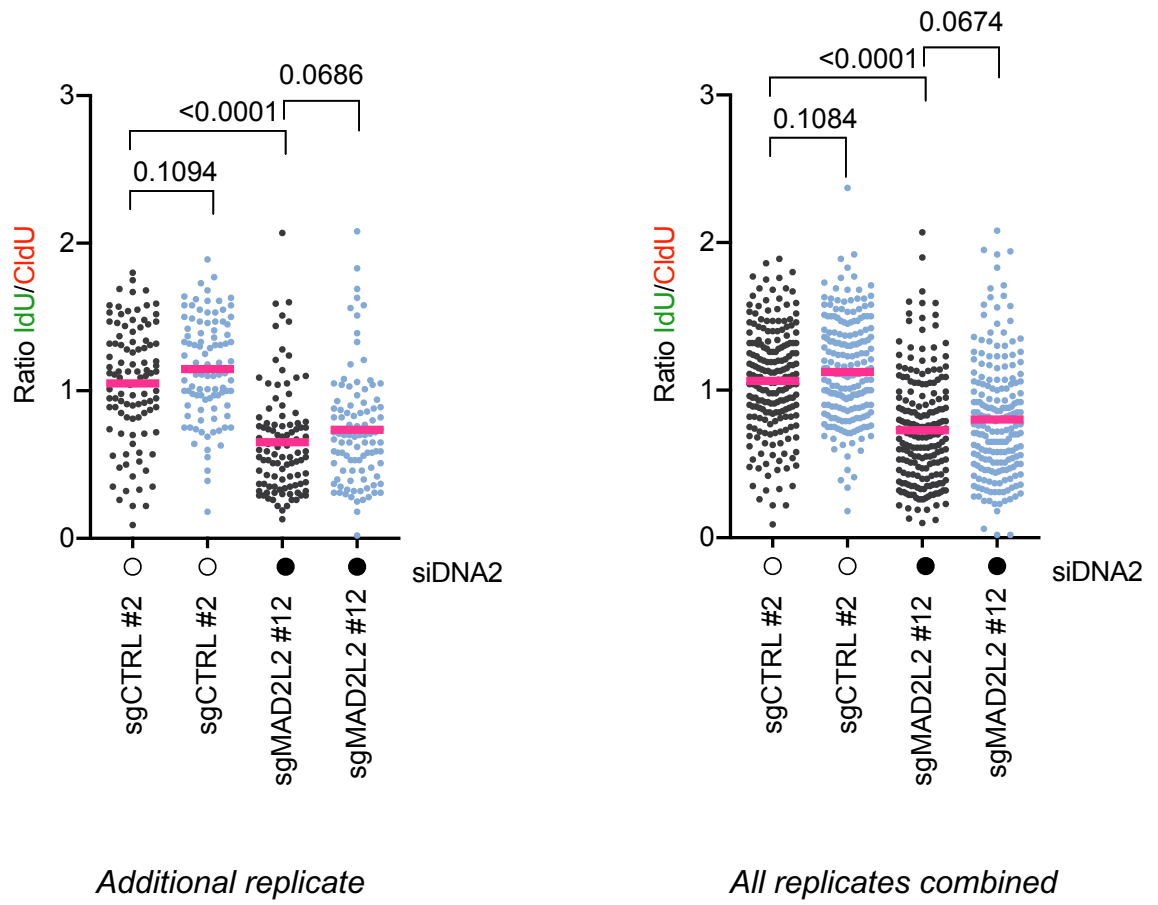

# Extended Data 1: Additional fiber replicates and combined fiber plots of all replicates

## Extended Data 1n - related to Fig. S4b

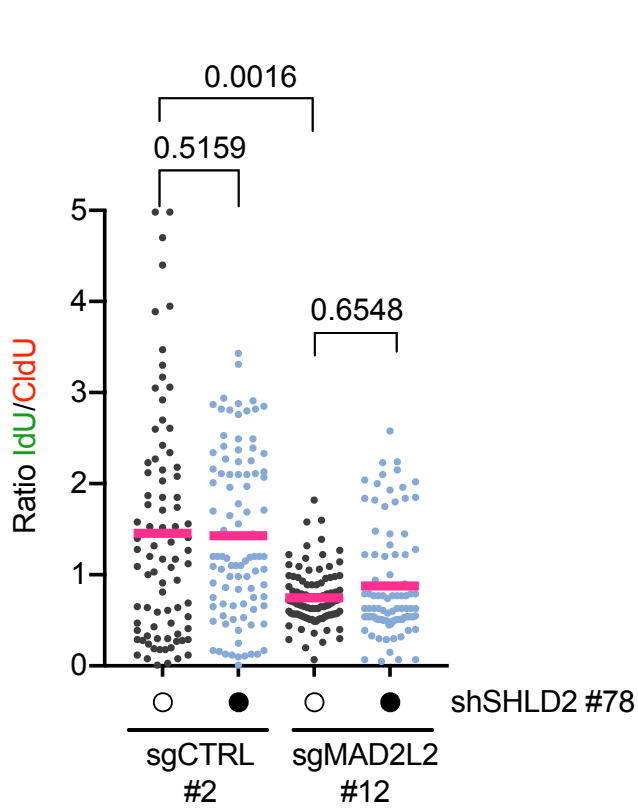

*Additional replicate*

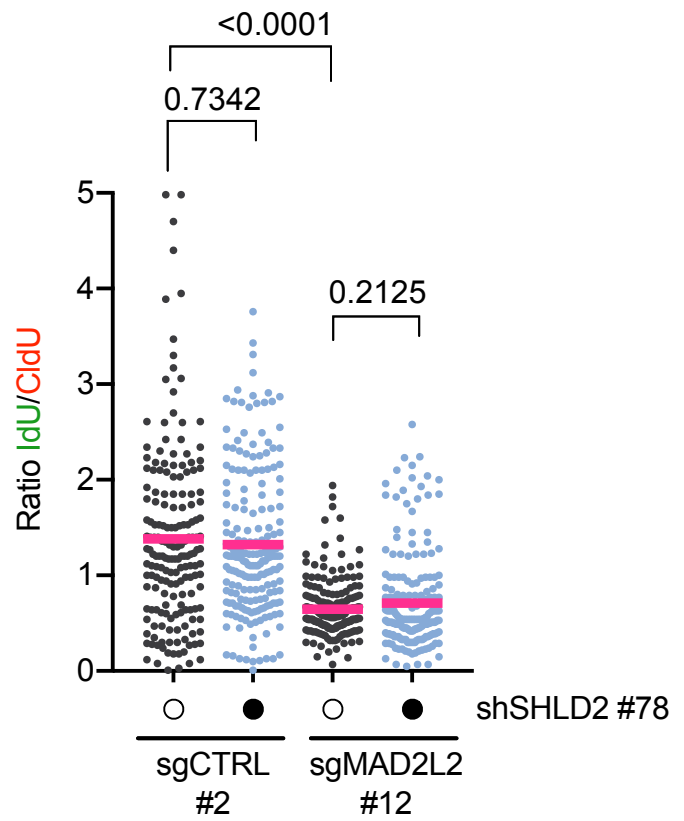

*All replicates combined*

# Extended Data 1: Additional fiber replicates and combined fiber plots of all replicates

## Extended Data 1o - related to Fig. 5c

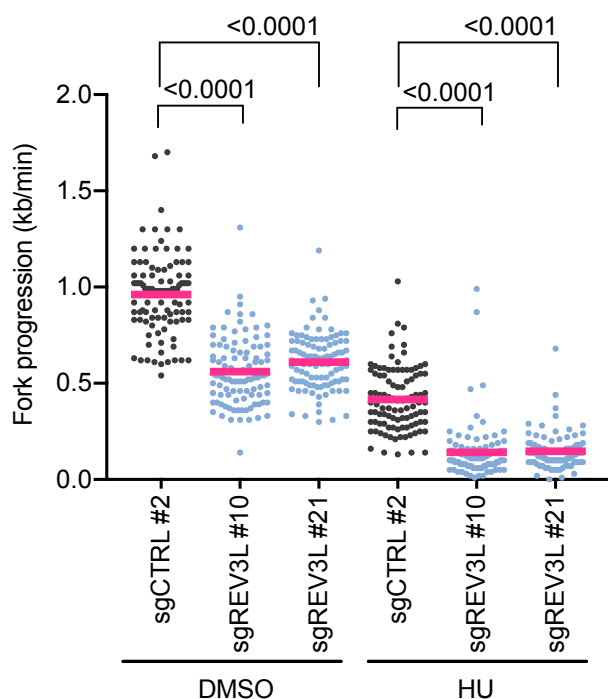

*Additional replicate*

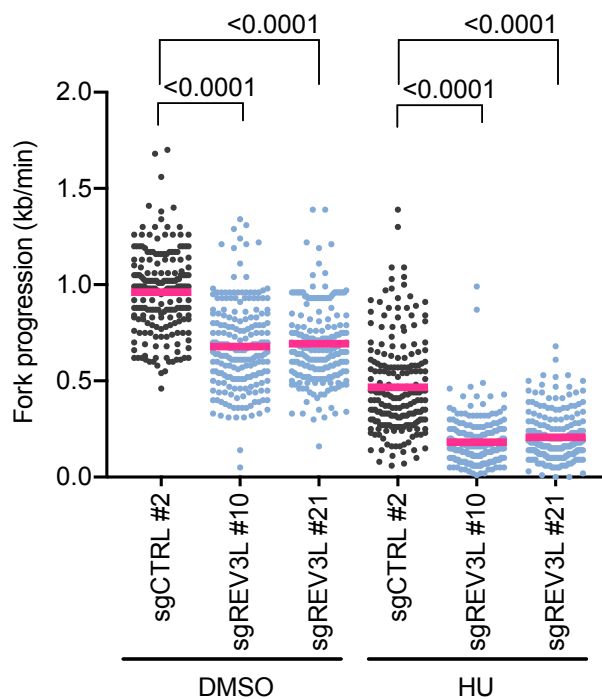

*All replicates combined*

# Extended Data 1: Additional fiber replicates and combined fiber plots of all replicates

## Extended Data 1p - related to Fig. 5d

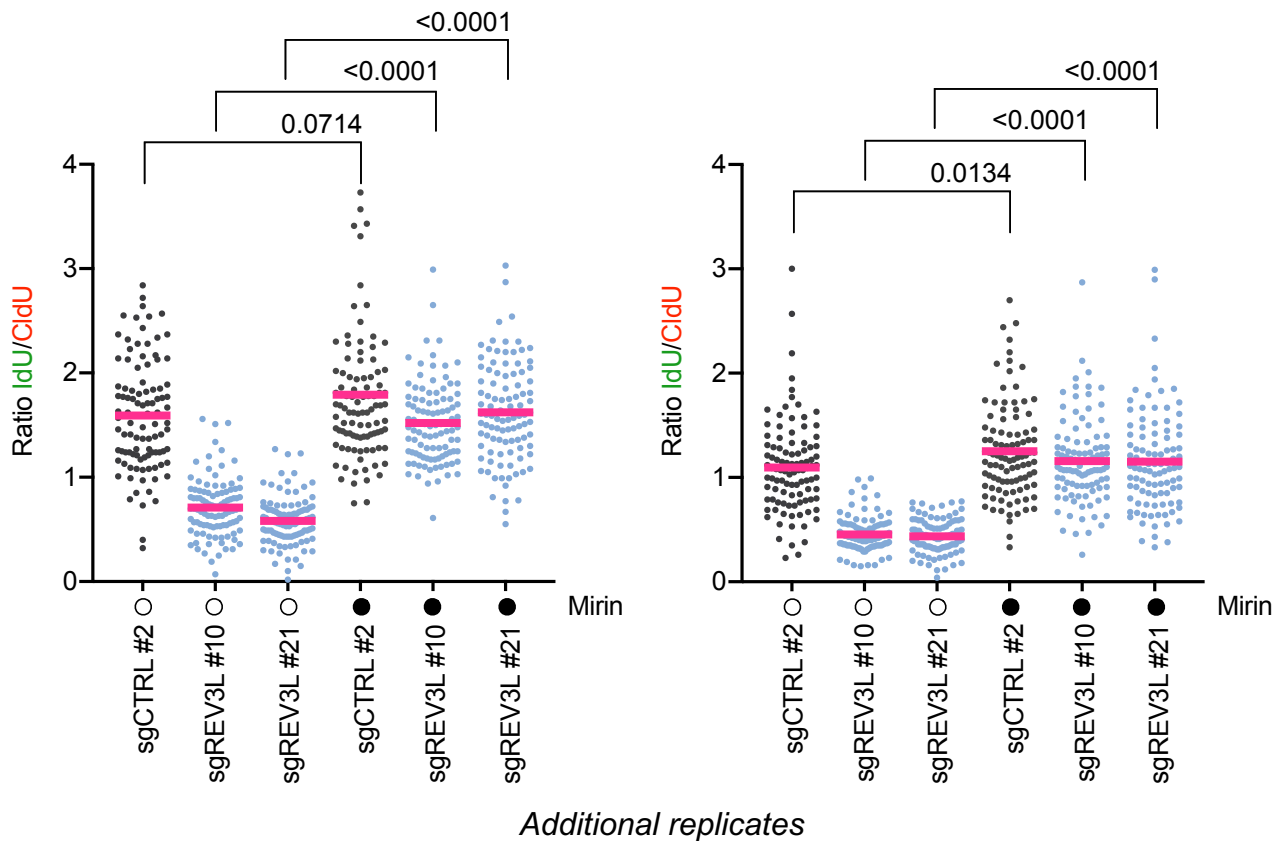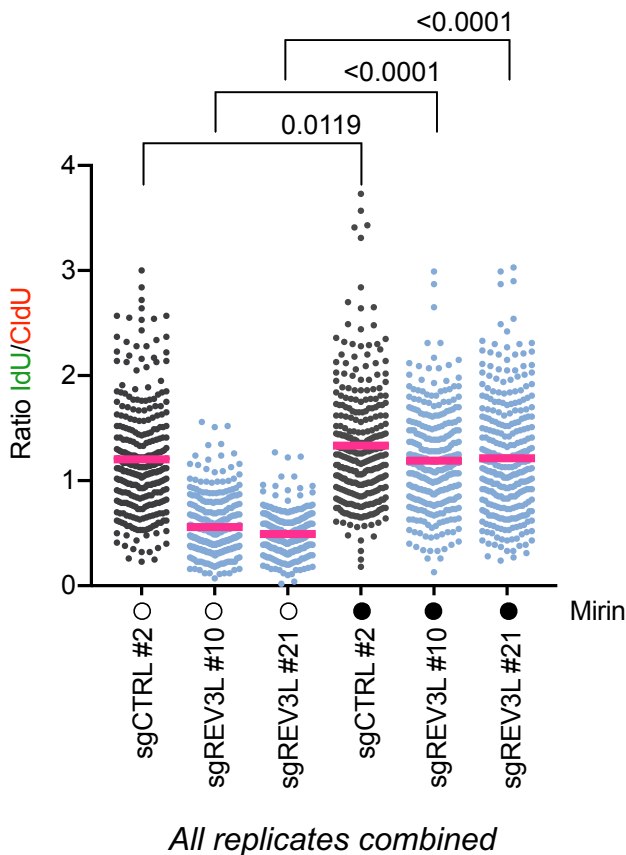

# Extended Data 1: Additional fiber replicates and combined fiber plots of all replicates

## Extended Data 1q- related to Fig. 6a

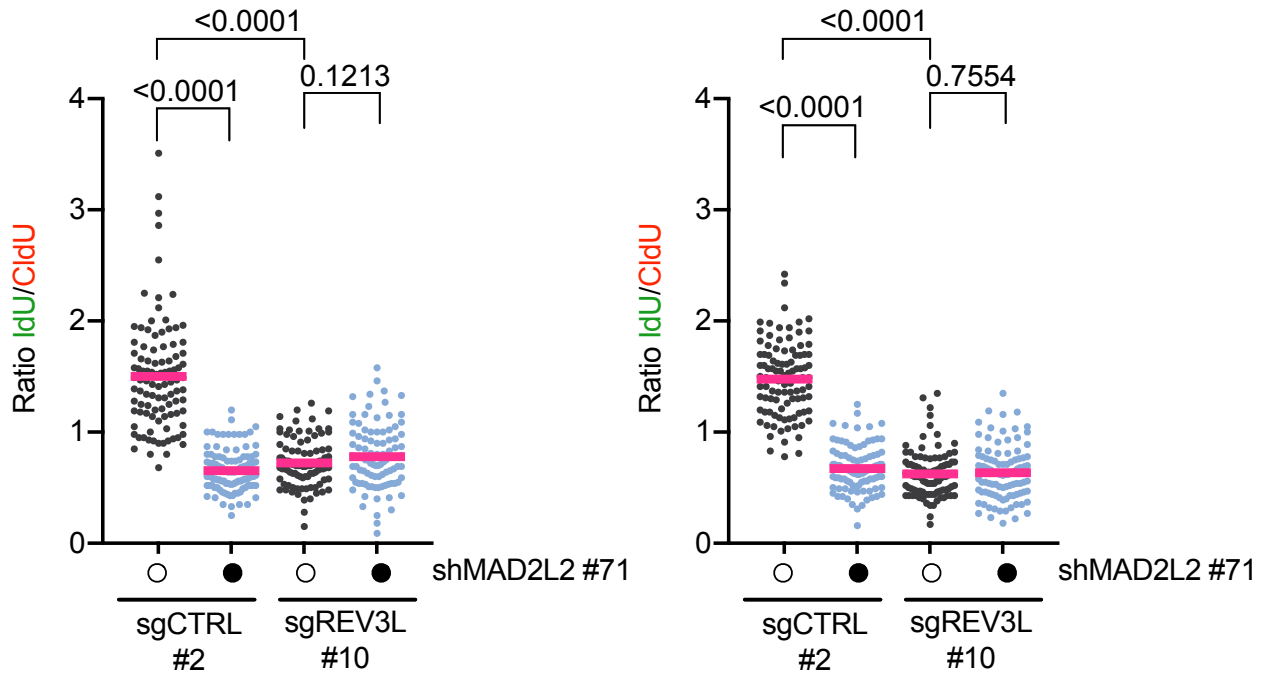

*Additional replicates*

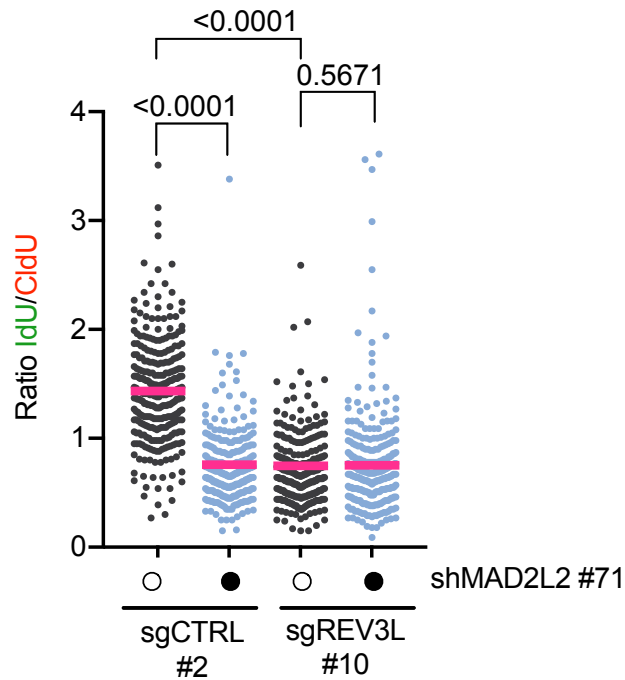

*All replicates combined*



# Extended Data 1: Additional fiber replicates and combined fiber plots of all replicates

## Extended Data 1r - related to Fig. 6e

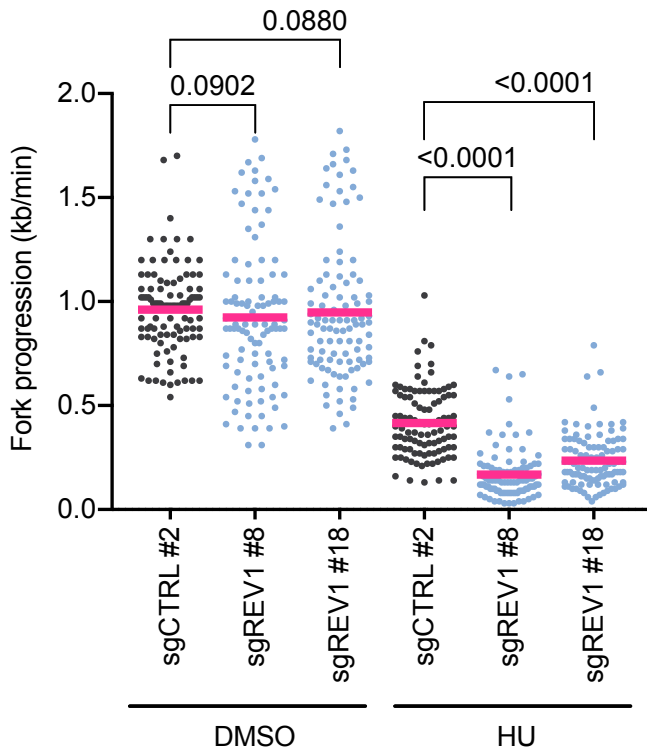

*Additional replicate*

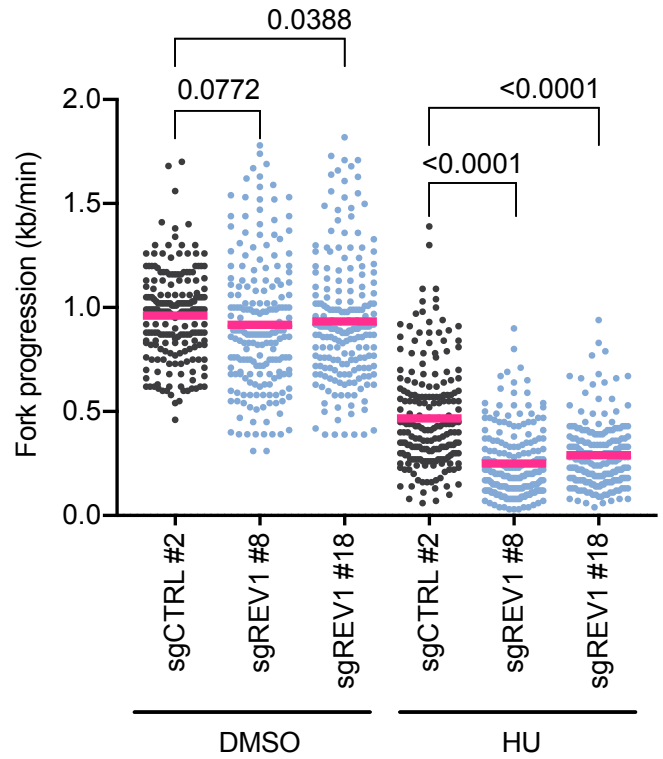

*All replicates combined*

# Extended Data 1: Additional fiber replicates and combined fiber plots of all replicates

## Extended Data 1s - related to Fig. 6f

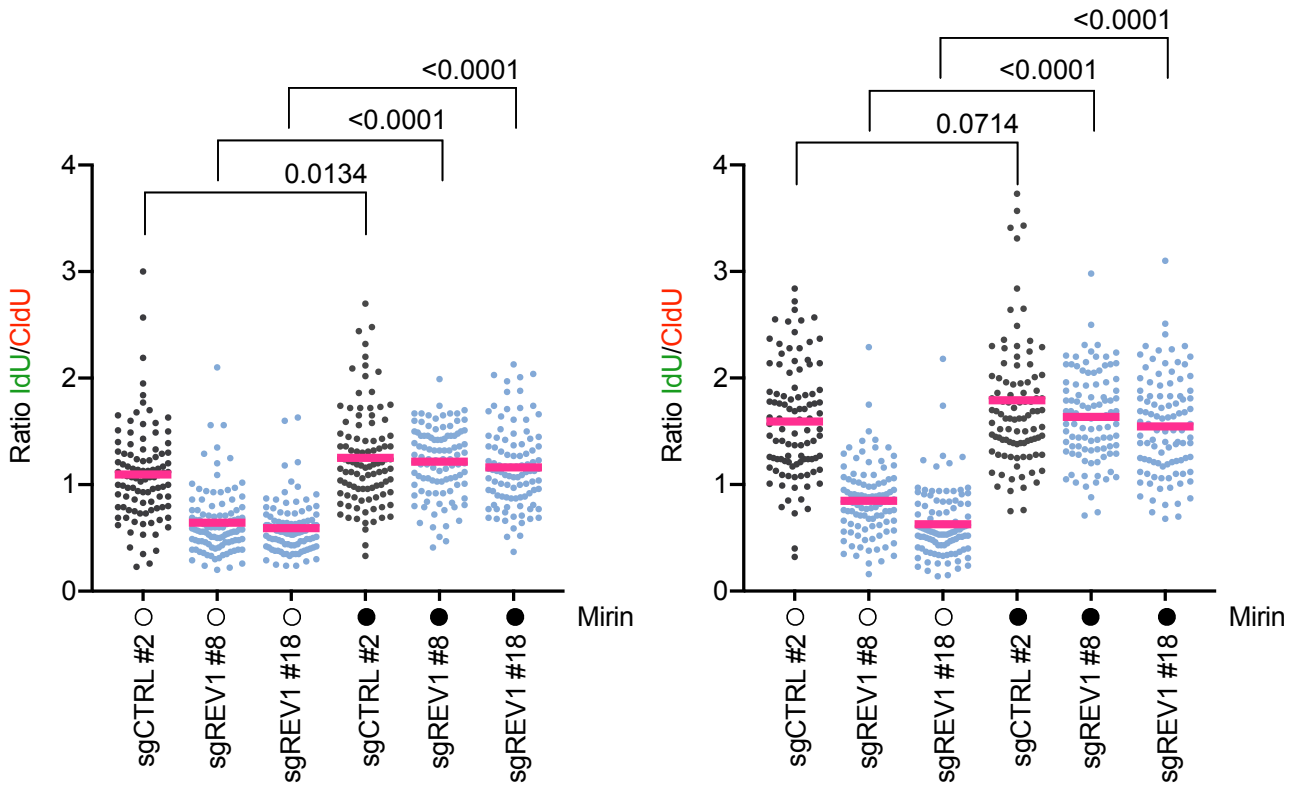

*Additional replicates*

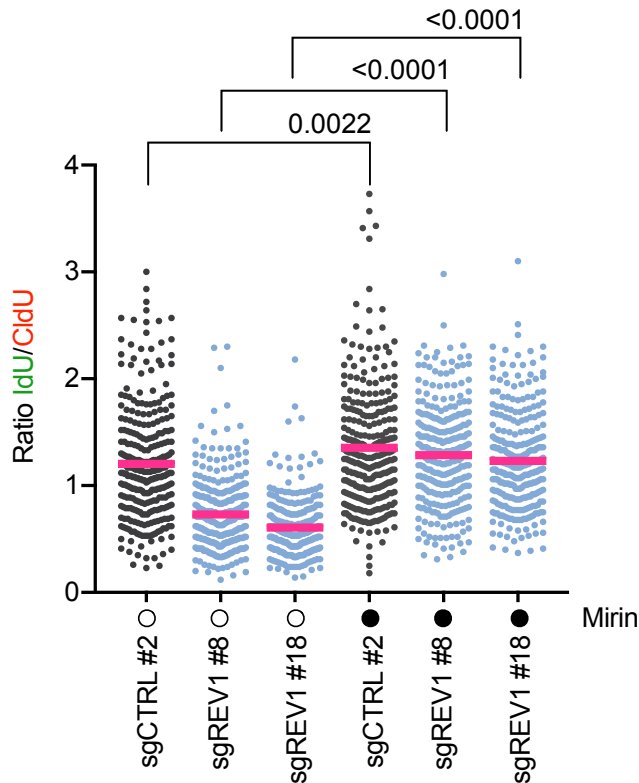

*All replicates combined*

# Extended Data 1: Additional fiber replicates and combined fiber plots of all replicates

## Extended Data 1t - related to Fig. 6h

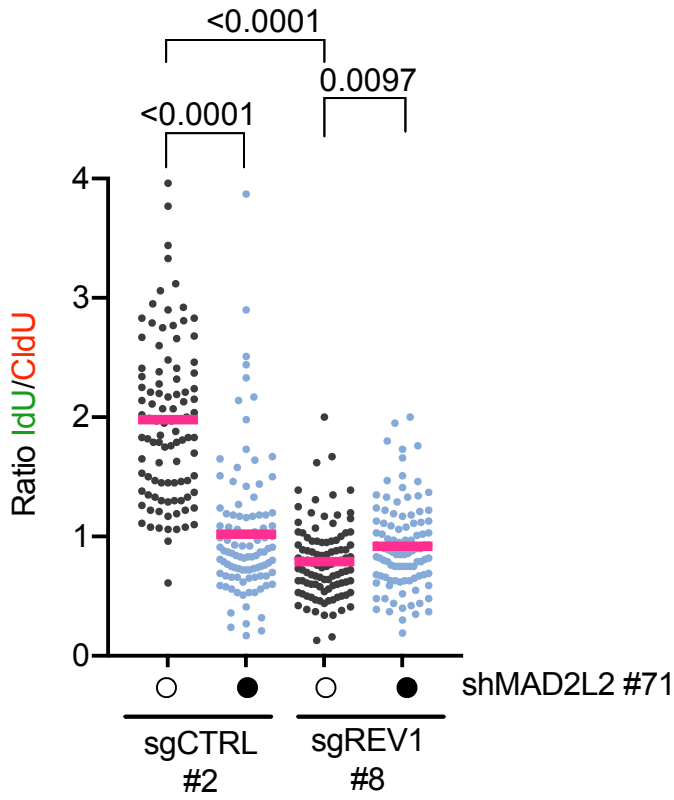

*Additional replicate*

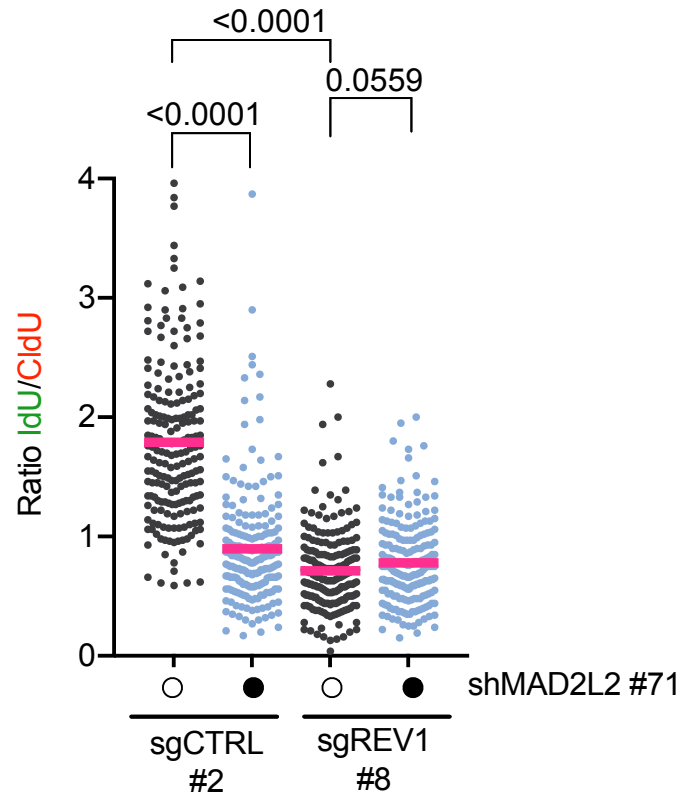

*All replicates combined*

# Extended Data 1: Additional fiber replicates and combined fiber plots of all replicates

## Extended Data 1u - related to Fig. 7a

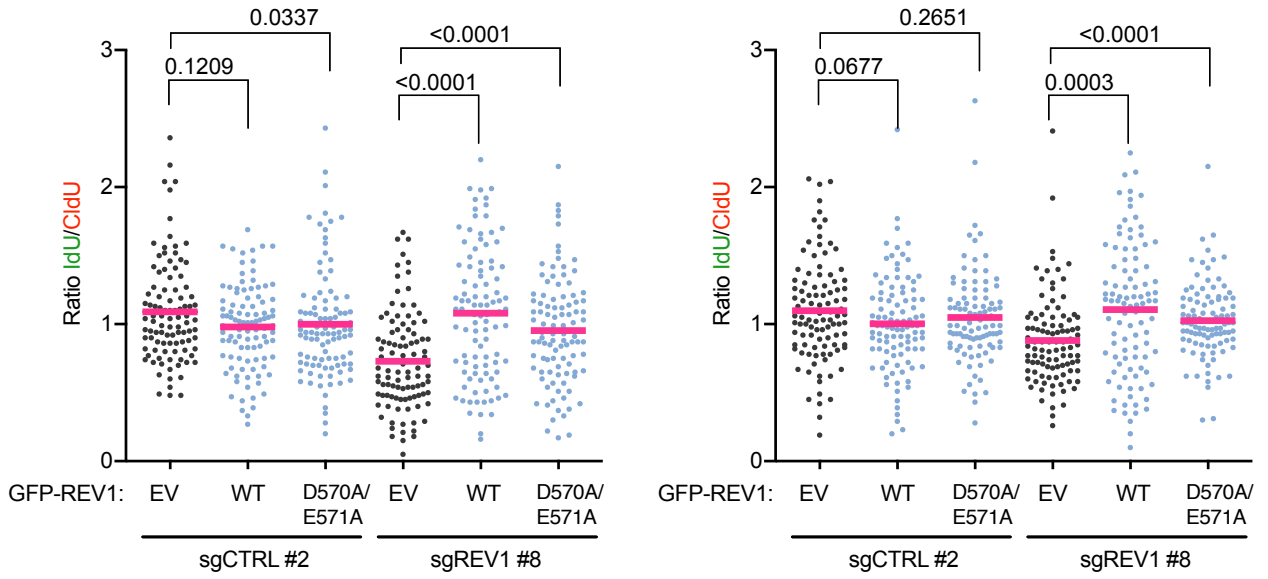

### Additional replicates

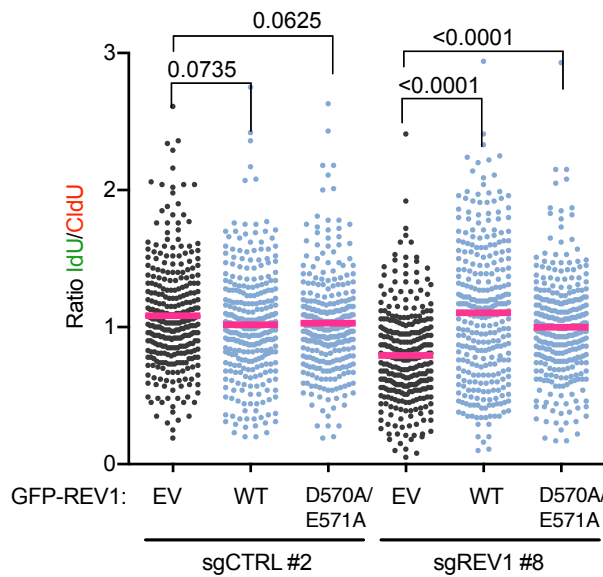

### All replicates combined

# Extended Data 1: Additional fiber replicates and combined fiber plots of all replicates

## Extended Data 1v - related to Fig. 7b

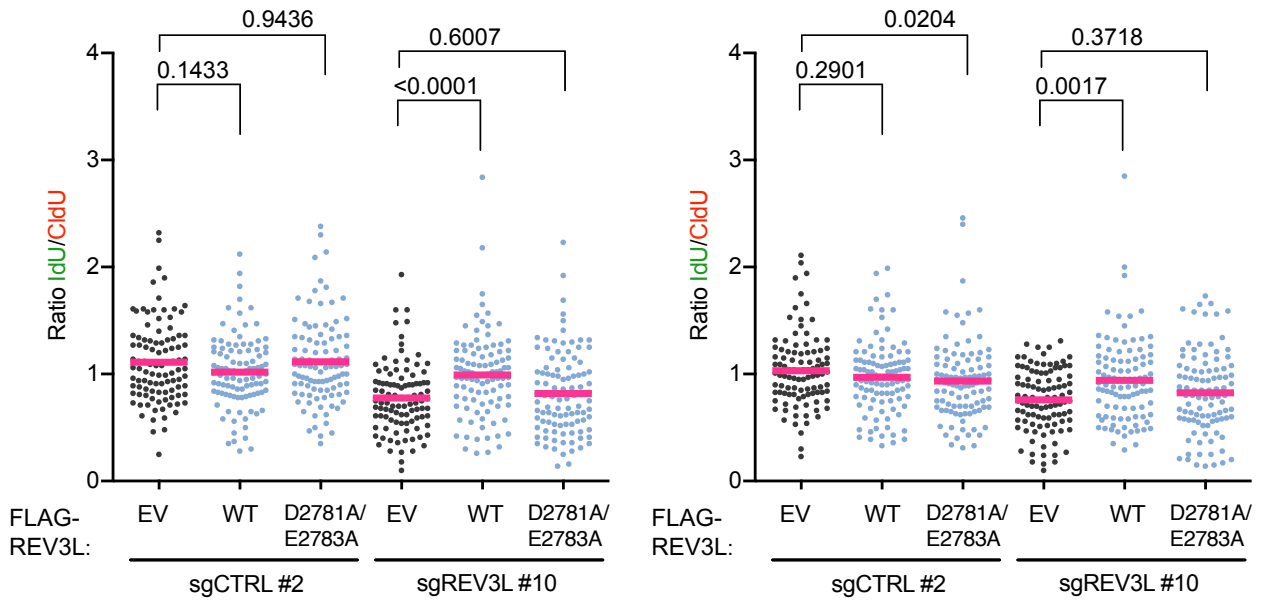

### Additional replicates

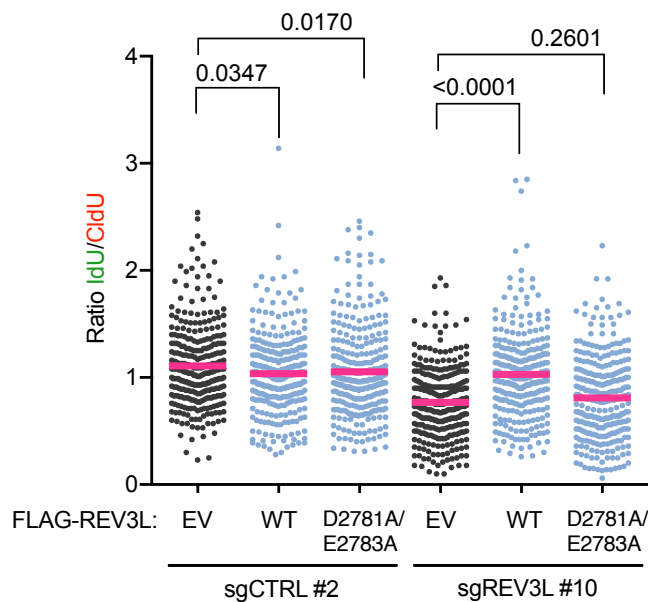

### All replicates combined
