# Supplementary material for: MAD2L2 promotes replication fork protection and recovery in a shieldin-independent and REV3L-dependent manner
Source: PubMed Central journal article supplement (PMC9458726; doi:10.1038/s41467-022-32861-5), 2022-09-08
Supplement: 41467_2022_32861_MOESM3_ESM.pdf [file 41467_2022_32861_MOESM3_ESM.pdf]

## **Description of Additional Supplementary Files**

File Name: **Supplementary Data 1**

Description: An overview of the sgRNA and shRNA sequences used in this study (sgRNAs: tab 1; shRNAs: tab 2).

File Name: **Supplementary Data 2**

Description: An overview of the genomic PCR primers used in this study to check editing of sgRNAs (tab 1), a list of the primers used for RT-qPCR (tab 2), and a list of the primers used for site-directed mutagenesis (tab 3).

File Name: **Supplementary Data 3**

Description: Gene-editing efficiencies of the sgRNAs targeting *SHLD1* as determined by genome sequencing and TIDE analysis.
